# Supplementary material for: Genome-wide analysis correlates Ayurveda Prakriti
Source: PubMed Central journal article supplement (PMC4625161; doi:10.1038/srep15786), 2015-10-29
Supplement: srep15786-s1.pdf [file srep15786-s1.pdf]

# Supplementary materials

## Genome-wide analysis correlates *Ayurveda Prakriti*

Periyasamy Govindaraj<sup>1,+</sup>, Sheikh Nizamuddin<sup>1,+</sup>, Anugula Sharath<sup>1</sup>, Vuskamalla Jyothi<sup>1</sup>, Harish Rotti<sup>2</sup>, Ritu Raval<sup>2</sup>, Jayakrishna Nayak<sup>3</sup>, Balakrishna K Bhat<sup>3</sup>, B.V. Prasanna<sup>3</sup>, Pooja Shintre<sup>4</sup>, Mayura Sule<sup>4</sup>, Kalpana S. Joshi<sup>4</sup>, Amrish P. Dedge<sup>4</sup>, Ramachandra Bharadwaj<sup>5</sup>, G.G. Gangadharan<sup>5</sup>, Sreekumaran Nair<sup>6</sup>, Puthiya M Gopinath<sup>2</sup>, Bhushan Patwardhan<sup>7</sup>, Paturu Kondaiah<sup>8</sup>, Kapaettu Satyamoorthy<sup>2</sup>, Marthanda Varma Sankaran Valiathan<sup>2</sup>, Kumarasamy Thangaraj<sup>1,\*</sup>

<sup>1</sup>CSIR-Centre for Cellular and Molecular Biology, Hyderabad, Telangana, India

<sup>2</sup>School of Life Sciences, Manipal University, Manipal, Karnataka, India,

<sup>3</sup>Shri Dharmasthala Manjunatheshwara College of Ayurveda, Udupi, Karnataka, India

<sup>4</sup>Sinhgad College of Engineering, Pune, Maharashtra, India

<sup>5</sup>Foundation for Revitalization of Local Health Traditions, Bangalore, Karnataka, India

<sup>6</sup>Department of Statistics, Manipal University, Manipal, Karnataka, India,

<sup>7</sup>Interdisciplinary School of Health Sciences, University of Pune, Pune, Maharashtra, India

<sup>8</sup>Department of Molecular Reproduction, Development and Genetics, Indian Institute of Science, Bangalore, Karnataka, India

<sup>+</sup>These authors contributed equally to this work.

### \*Corresponds to:

Kumarasamy Thangaraj  
CSIR-Centre for Cellular and Molecular Biology  
Hyderabad 500 007, India  
Phone: +91-40-27192828  
Fax: +91-40-27160591  
E-mail: thangs@ccmb.res.in

# **Supplementary Figures**

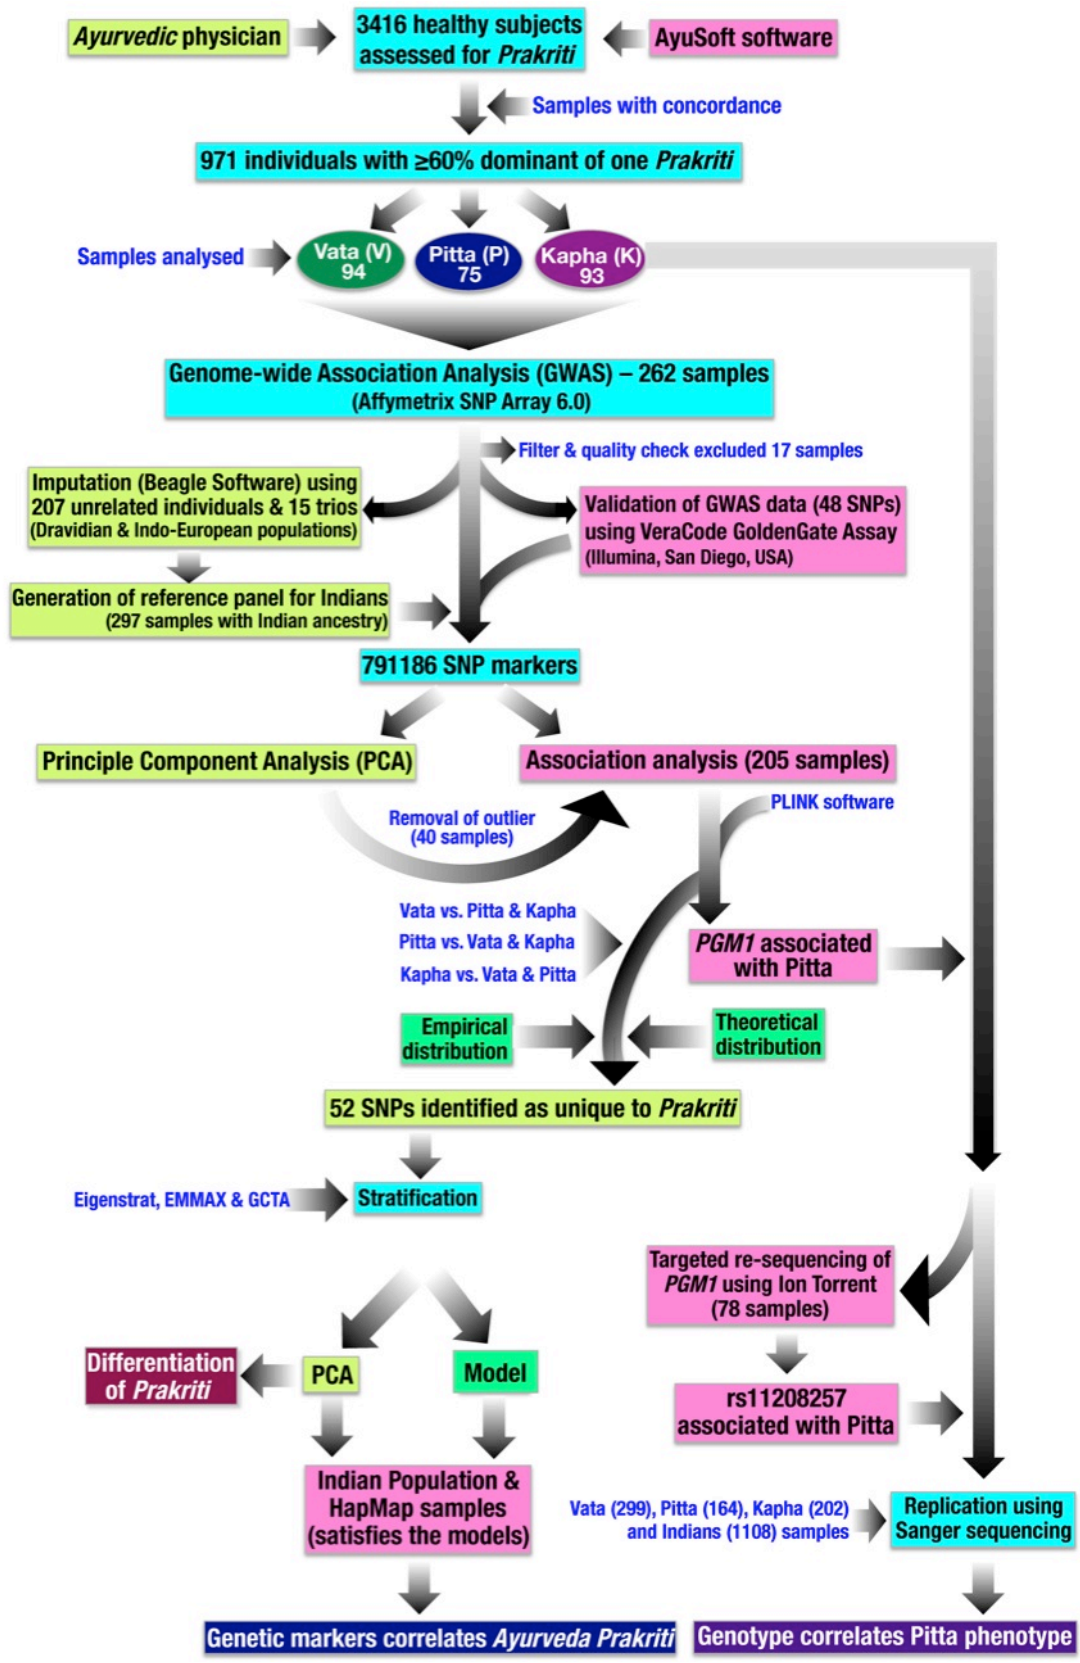

Figure S1. Schematic representation of methodologies/workflow used in this study.

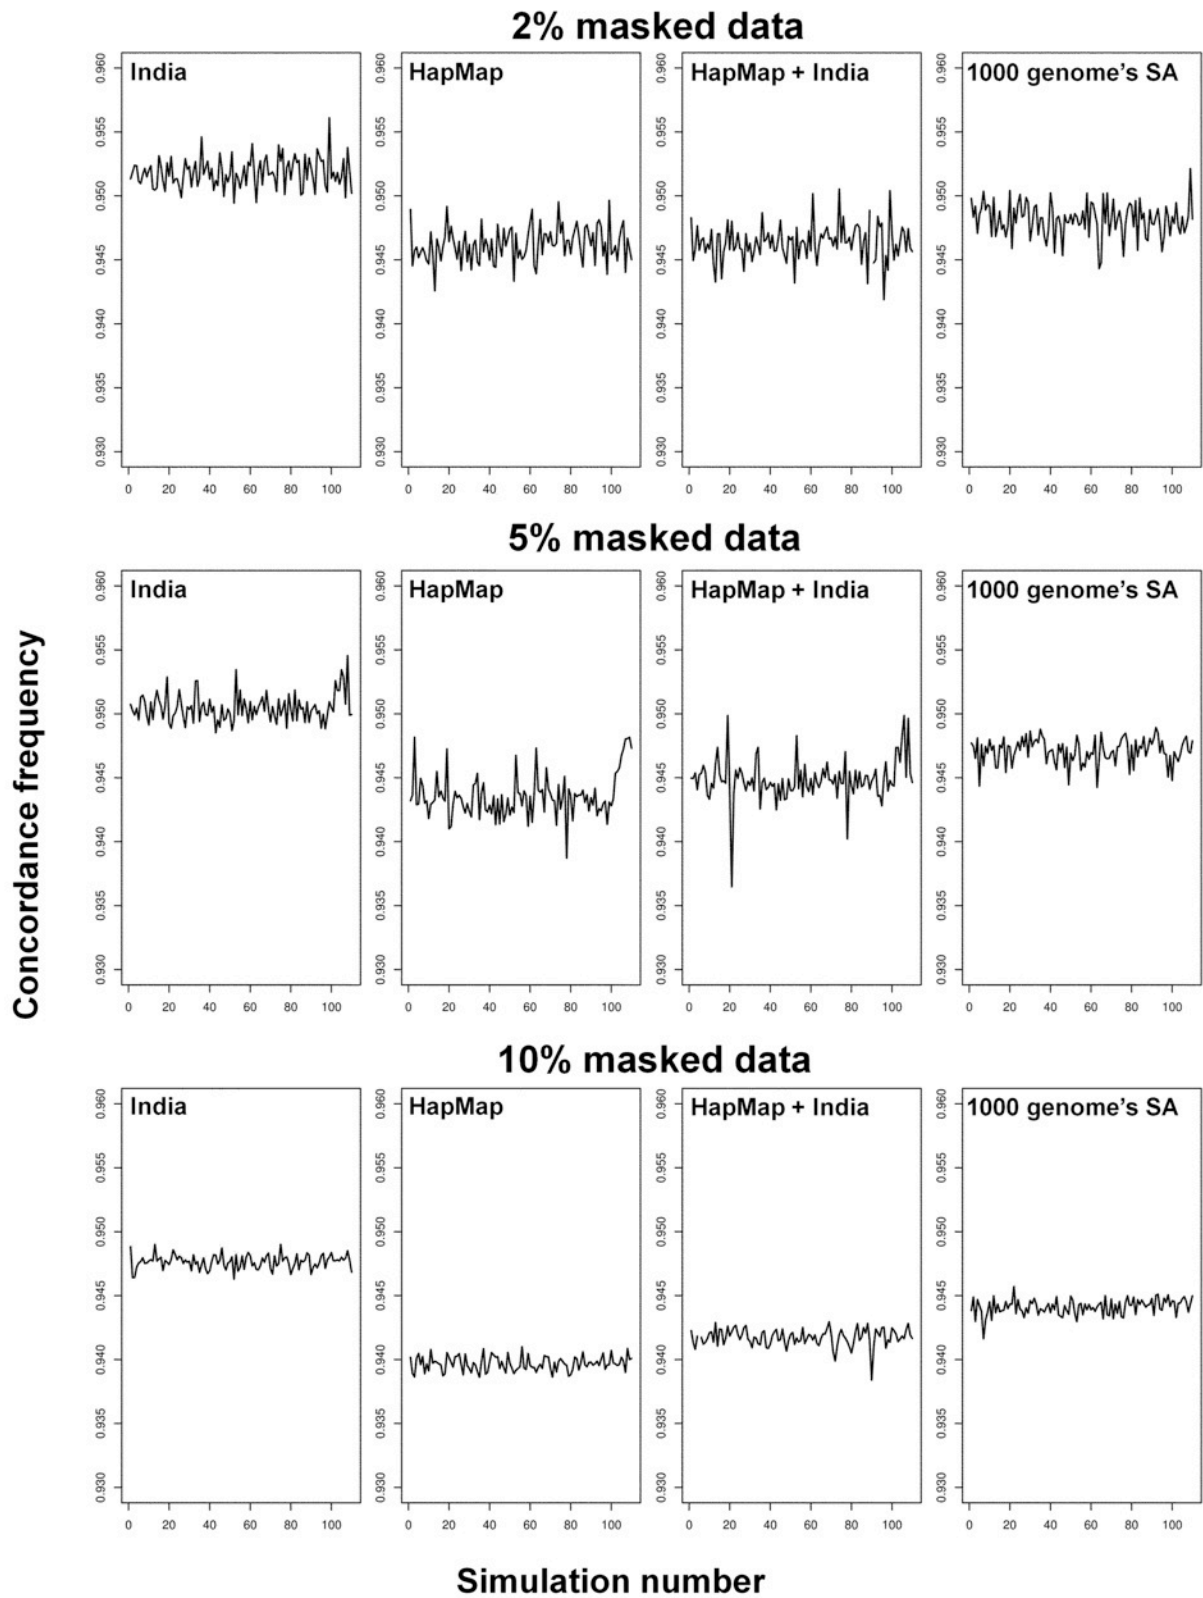

**Figure S2.** Genotype imputation and their performance on 2%, 5% and 10% masked data with different reference population (India, HapMap, India+HapMap and 1000 Genome project's South-Asian samples).

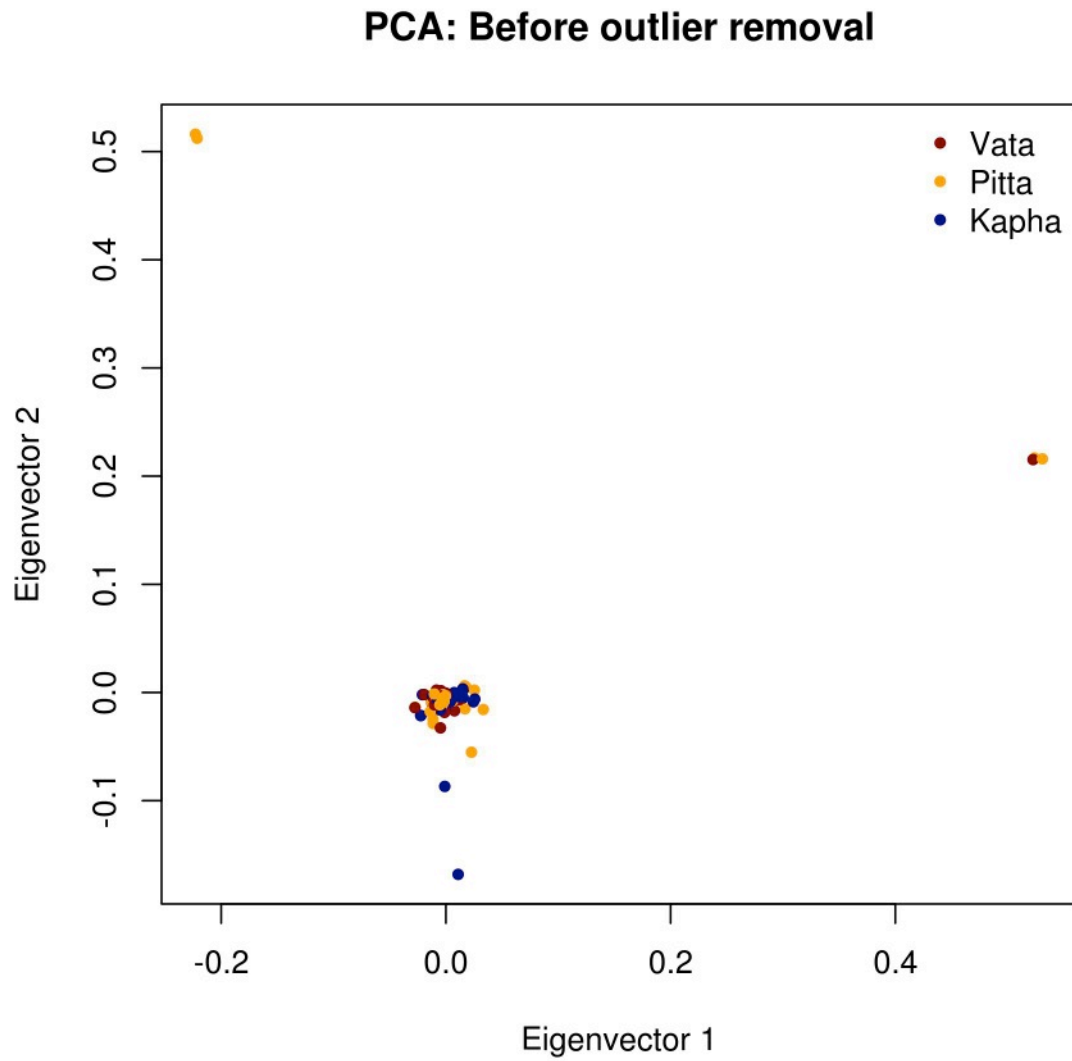

**Figure S3.** Principal component analysis (PCA) of 245 *Prakriti* individuals using 405,782 SNP markers.

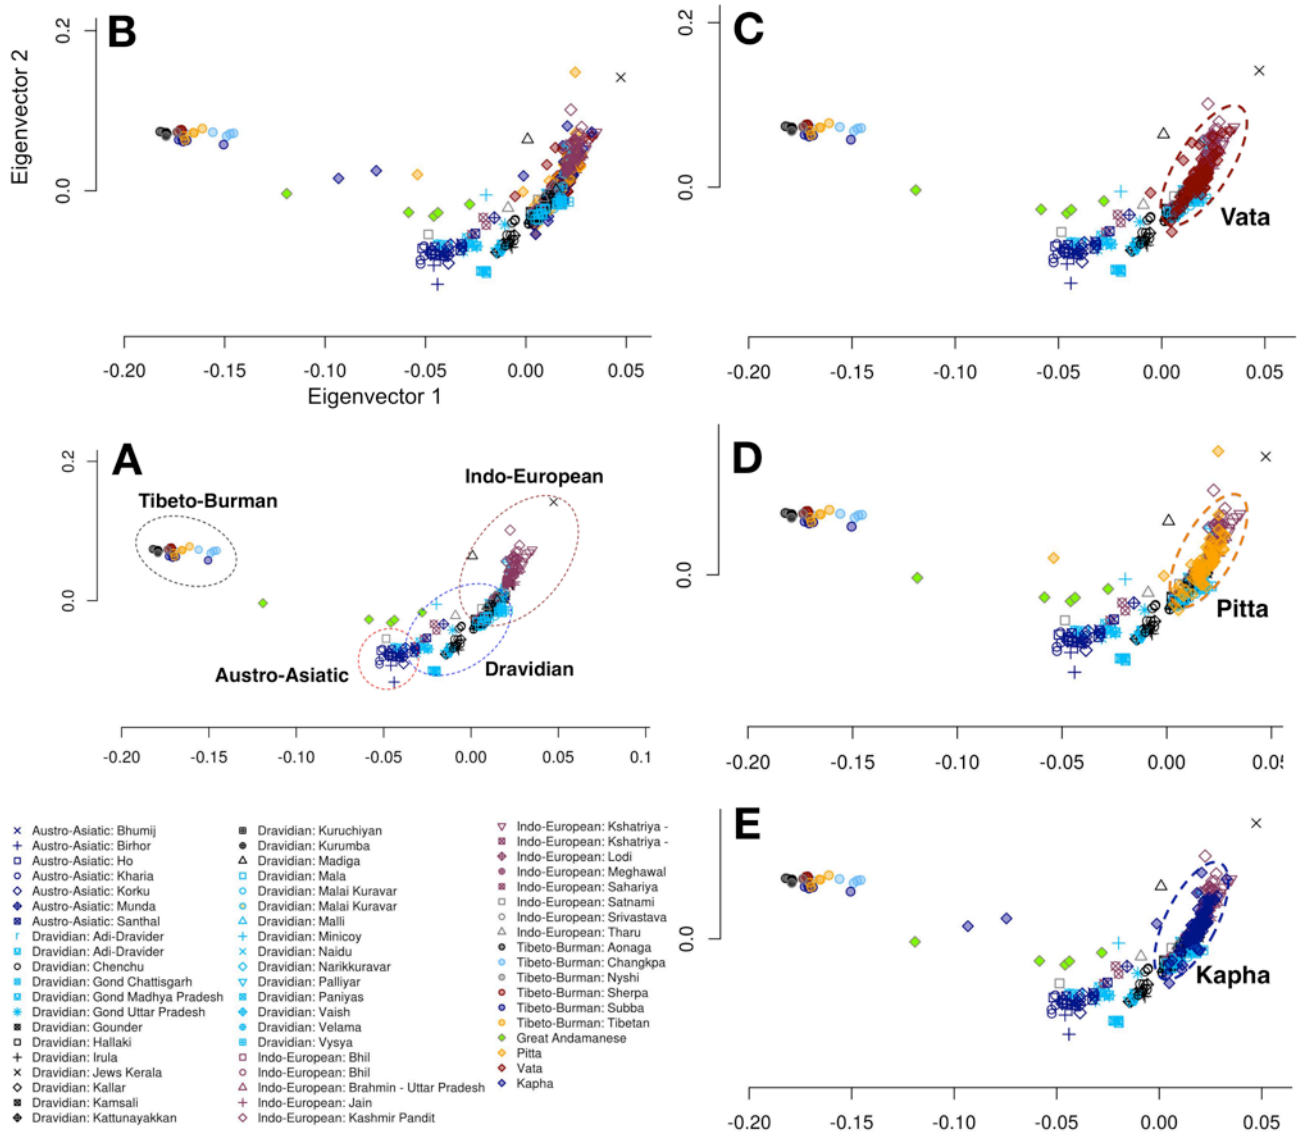

**Figure S4.** Tracing the ancestry of *Prakriti* individuals. Analysis reveals that majority of the *Prakriti* samples clusters with the Dravidian, and Indo-European linguistic groups. A). PCA analysis of Indian samples with all the three *Prakriti* samples. B, C, D and E are PCA plots on eigen1 and eigen2 generated in A. B). PCA of 297 Indian population samples. C). PCA of Indian samples with Vata. D). PCA of Indian samples with Pitta. E). PCA of Indian samples with Kapha.

### PCA: After outlier removal

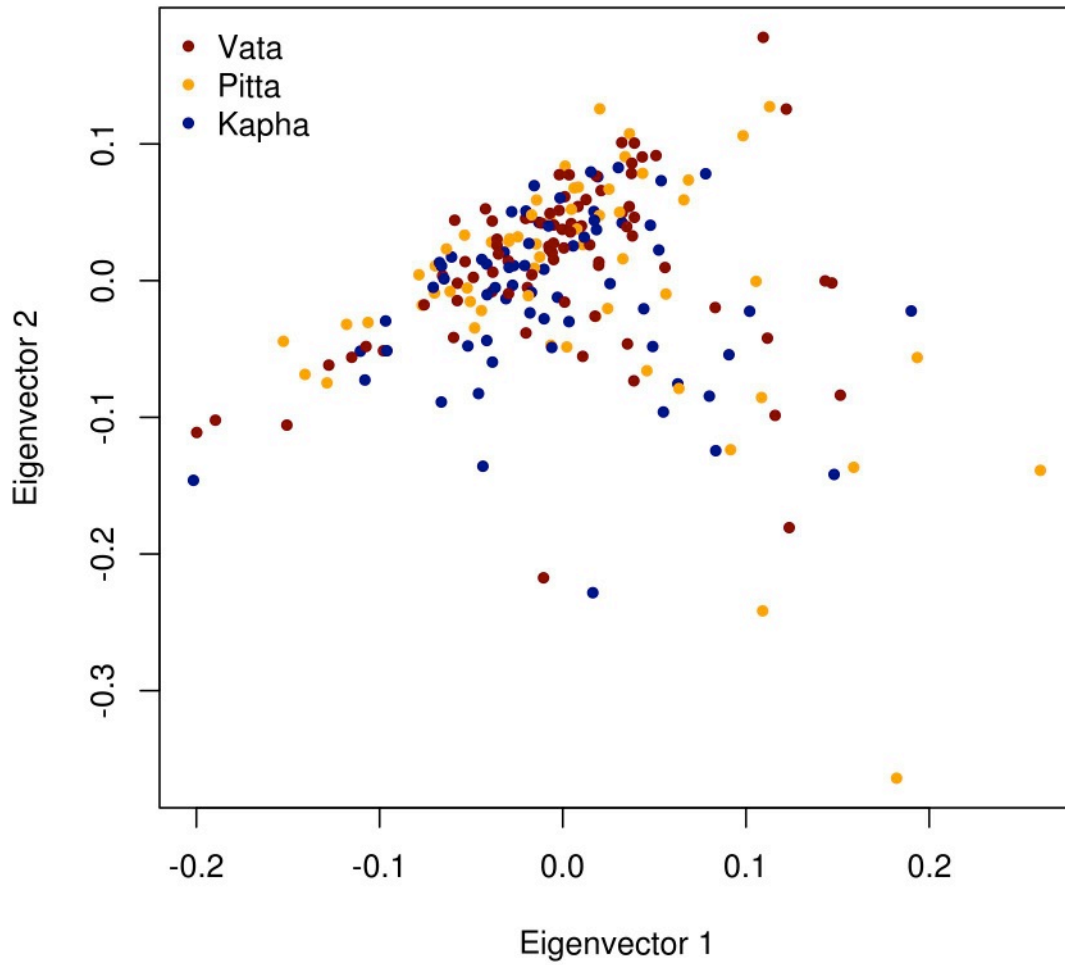

**Figure S5.** PCA of 205 *Prakriti* individuals after removal of 40 outlier samples.

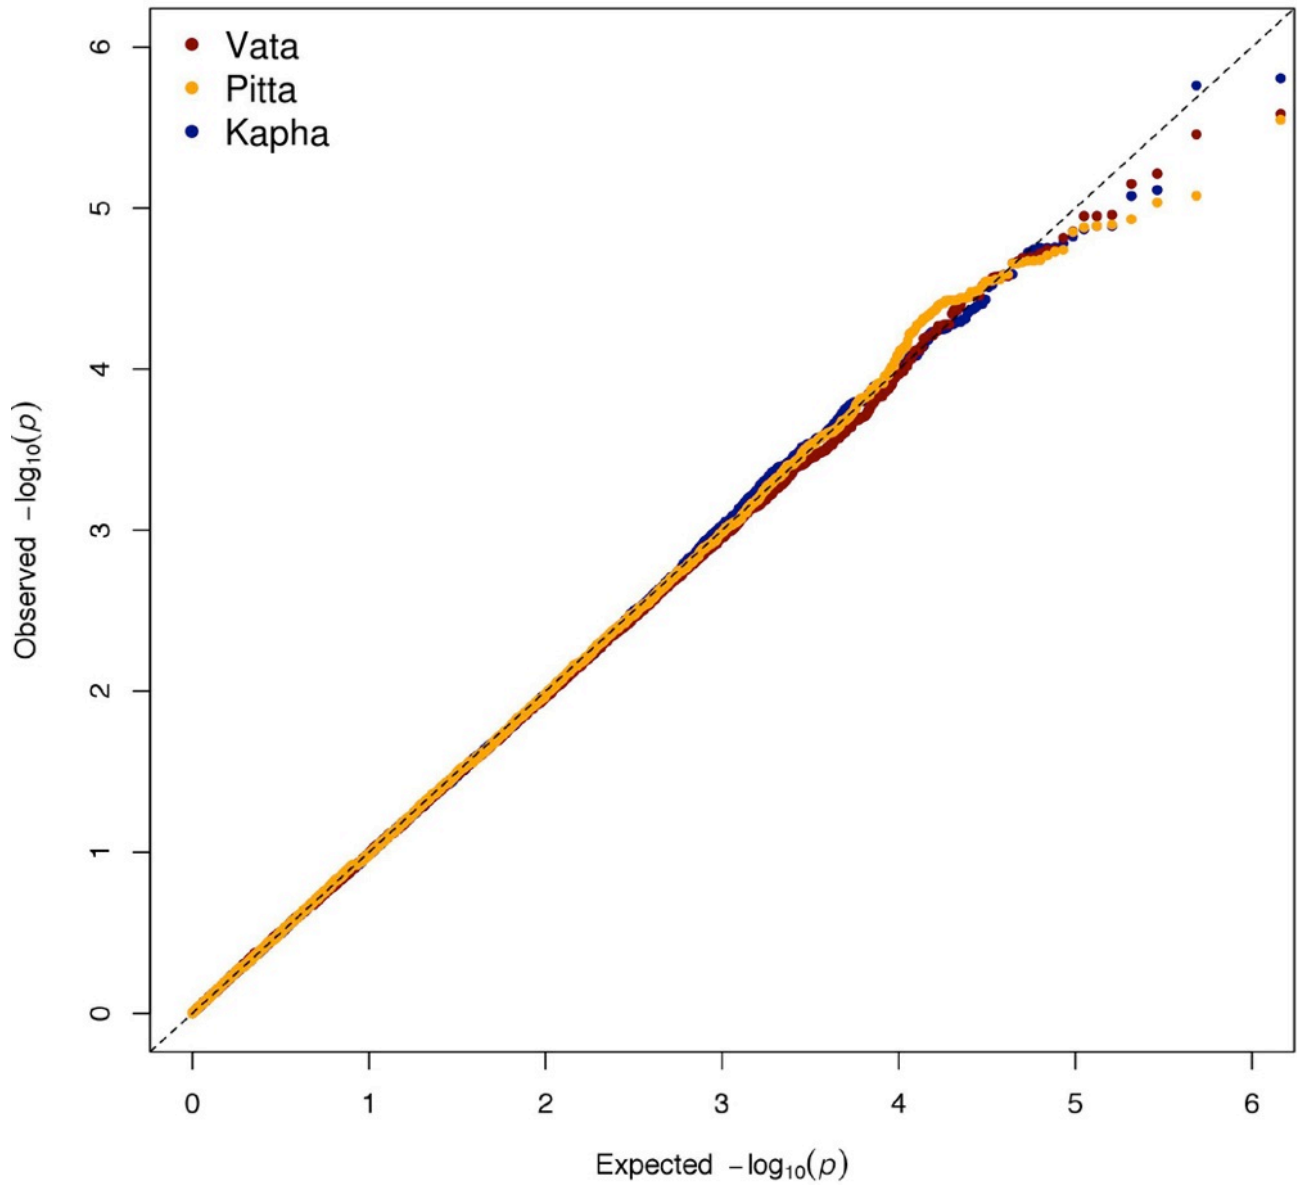

**Figure S6.** QQ plot of genome-wide association analysis. Deviation from expected p-value is evident only in the tail distribution.



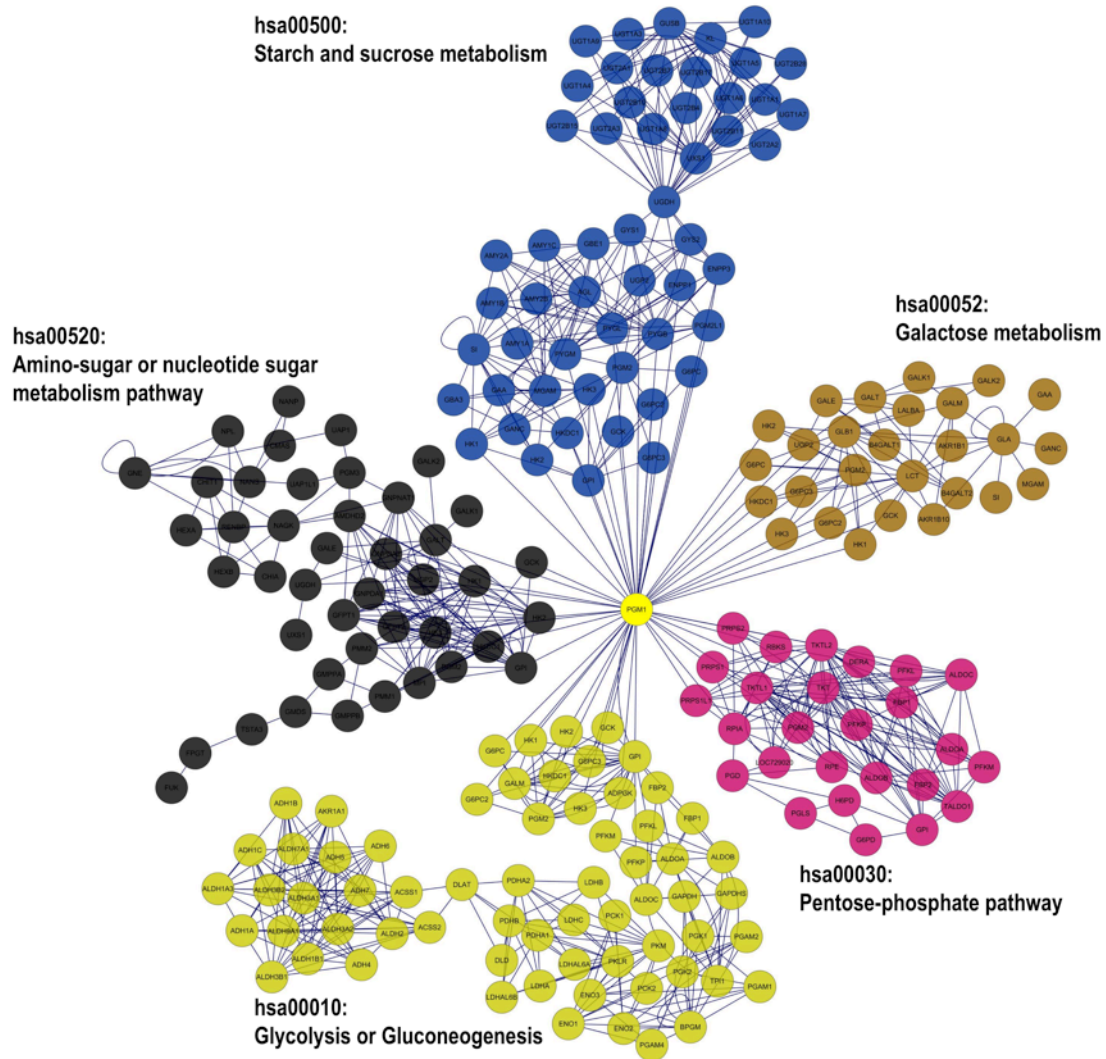

**Figure S7.** KEGG pathway analysis of *PGMI* gene.

*PGM1*:  
Assoc=*Pvs.VK*

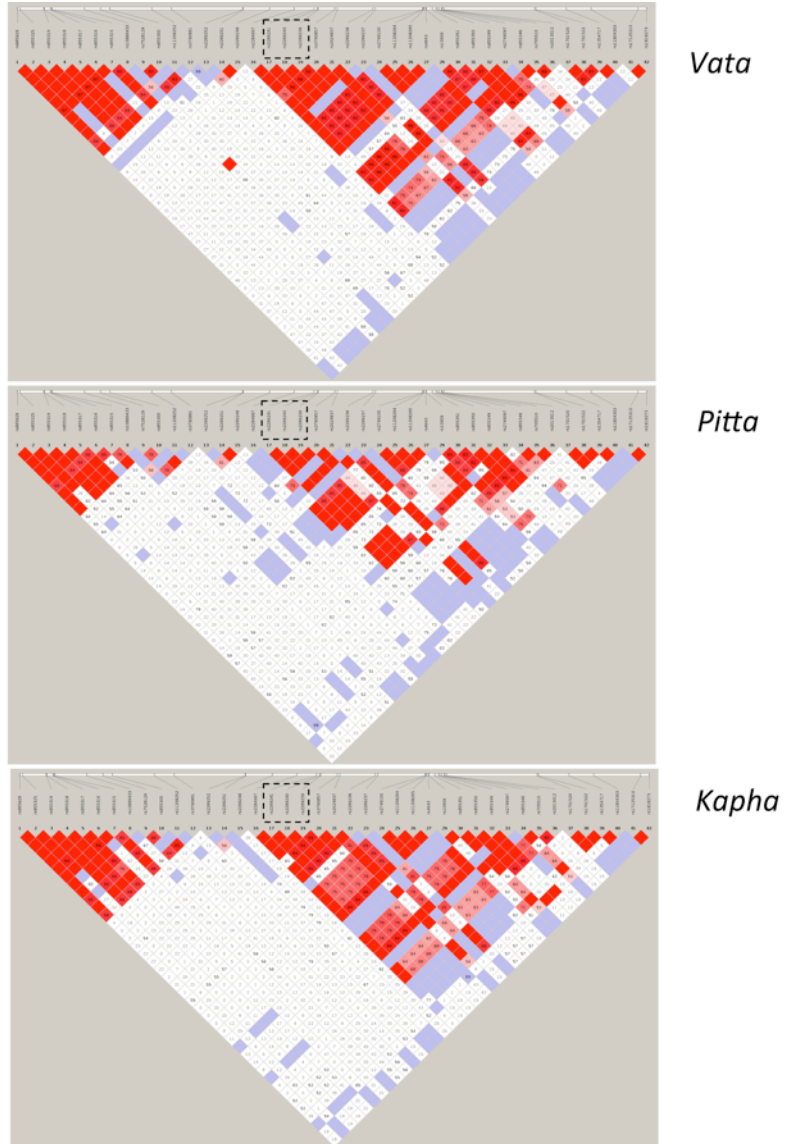

**Figure S8.** Linkage disequilibrium analysis for *PGM1* gene.

# **Supplementary Tables**

**Table S1.** The details of the *Prakriti* individuals, who were subjected to genome-wide SNP analysis using Affymetrix (6.0) array. P - Pitta; K –Kapha; V – Vata.

| S. No | Sample ID | Prakriti | First Dominant (%) | Second Dominant (%) | Third Dominant (%) | Gender | BMI  | Linguistic group |
|-------|-----------|----------|--------------------|---------------------|--------------------|--------|------|------------------|
| 1     | B004      | Kapha    | 62                 | P26                 | V12                | Male   | 22   | -                |
| 2     | B014      | Kapha    | 82                 | P14                 | V4                 | Male   | 29   | -                |
| 3     | B016      | Kapha    | 87                 | V7                  | P6                 | Male   | 20.8 | -                |
| 4     | B018      | Kapha    | 67                 | P18                 | V15                | Male   | 19.4 | Dravidian        |
| 5     | B020      | Kapha    | 64                 | P19                 | V17                | Male   | 17.6 | -                |
| 6     | B042      | Kapha    | 78                 | P18                 | V4                 | Male   | 24.1 | Indo-European    |
| 7     | B051      | Kapha    | 79                 | P17                 | K4                 | Male   | 26.1 | Indo-European    |
| 8     | B053      | Kapha    | 80                 | P15                 | V5                 | Male   | 27.8 | Dravidian        |
| 9     | B056      | Kapha    | 78                 | V12                 | P10                | Male   | 20.7 | Dravidian        |
| 10    | B059      | Kapha    | 76                 | P16                 | V8                 | Male   | 21.9 | Dravidian        |
| 11    | B128      | Kapha    | 74                 | V16                 | P10                | Male   | 22.5 | Dravidian        |
| 12    | B157      | Kapha    | 83                 | V10                 | P7                 | Male   | 23.5 | Dravidian        |
| 13    | B161      | Kapha    | 62                 | P28                 | V10                | Male   | 23   | Dravidian        |
| 14    | B185      | Kapha    | 81                 | P15                 | V4                 | Male   | 22   | Indo-European    |
| 15    | B186      | Kapha    | 85                 | V8                  | P7                 | Male   | 22.5 | Dravidian        |
| 16    | B205      | Kapha    | 77                 | V12                 | P11                | Male   | 21.3 | Dravidian        |
| 17    | B206      | Kapha    | 78                 | P16                 | V6                 | Male   | 24.9 | Dravidian        |
| 18    | B209      | Kapha    | 75                 | V17                 | P8                 | Male   | 25.6 | Dravidian        |
| 19    | B211      | Kapha    | 70                 | V27                 | P3                 | Male   | 26.4 | Dravidian        |
| 20    | B213      | Kapha    | 88                 | V10                 | P2                 | Male   | 22.9 | Dravidian        |
| 21    | B215      | Kapha    | 64                 | P34                 | V2                 | Male   | 24.8 | Dravidian        |
| 22    | B257      | Kapha    | 70                 | P18                 | V12                | Male   | 25.6 | Dravidian        |
| 23    | B260      | Kapha    | 72                 | P15                 | V13                | Male   | 26.5 | Dravidian        |
| 24    | B262      | Kapha    | 64                 | V19                 | P17                | Male   | 22.2 | Indo-European    |
| 25    | B263      | Kapha    | 75                 | P17                 | V8                 | Male   | 28   | Indo-European    |
| 26    | B269      | Kapha    | 65                 | V21                 | P14                | Male   | 29.6 | Dravidian        |
| 27    | B272      | Kapha    | 68                 | V17                 | P15                | Male   | 28.4 | Dravidian        |
| 28    | B275      | Kapha    | 73                 | V20                 | P7                 | Male   | 22.6 | Indo-European    |
| 29    | B276      | Kapha    | 60                 | V24                 | K16                | Male   | 25.4 | Dravidian        |
| 30    | B277      | Kapha    | 65                 | P21                 | V14                | Male   | 23.3 | Dravidian        |
| 31    | B279      | Kapha    | 60                 | V22                 | P18                | Male   | 21.1 | Dravidian        |
| 32    | B280      | Kapha    | 73                 | P24                 | V3                 | Male   | 24.1 | Dravidian        |
| 33    | B281      | Kapha    | 74                 | P19                 | V7                 | Male   | 24.6 | Dravidian        |
| 34    | B283      | Kapha    | 63                 | P19                 | V18                | Male   | 22   | Tibeto-Burman    |
| 35    | B284      | Kapha    | 60                 | V26                 | P14                | Male   | 18.6 | Tibeto-Burman    |
| 36    | B285      | Kapha    | 60                 | P33                 | V 13               | Male   | 19.9 | Dravidian        |
| 37    | B290      | Kapha    | 60                 | V26                 | P14                | Male   | 19.3 | Dravidian        |
| 38    | P1043     | Kapha    | 67                 | V27                 | P6                 | Male   | 21.3 | Indo-European    |
| 39    | P668      | Kapha    | 67                 | P21                 | V12                | Male   | 23.9 | Indo-European    |
| 40    | P848      | Kapha    | 68                 | P20                 | V12                | Male   | 25.6 | Indo-European    |
| 41    | P442      | Kapha    | 66                 | P21                 | V13                | Male   | 21.4 | Indo-European    |
| 42    | P542      | Kapha    | 69                 | P21                 | V10                | Male   | 23.7 | Indo-European    |
| 43    | P607      | Kapha    | 73                 | V14                 | P13                | Male   | 23.8 | Indo-European    |
| 44    | P618      | Kapha    | 69                 | P24                 | V7                 | Male   | 25.6 | Indo-European    |
| 45    | P654      | Kapha    | 71                 | P17                 | V12                | Male   | 23.1 | Indo-European    |
| 46    | P668      | Kapha    | 67                 | P21                 | V12                | Male   | 23.9 | Indo-European    |
| 47    | P721      | Kapha    | 70                 | V15                 | P15                | Male   | 27.7 | Indo-European    |
| 48    | P721      | Kapha    | 70                 | V15                 | P15                | Male   | 27.7 | Indo-European    |
| 49    | P757      | Kapha    | 74                 | P18                 | V8                 | Male   | 26.1 | Indo-European    |
| 50    | P773      | Kapha    | 73                 | P16                 | V11                | Male   | 28.7 | Indo-European    |
| 51    | P774      | Kapha    | 75                 | P16                 | V9                 | Male   | 19.6 | Indo-European    |
| 52    | P817      | Kapha    | 69                 | P18                 | V13                | Male   | 33.4 | Indo-European    |
| 53    | P1045     | Kapha    | 64                 | V19                 | P17                | Male   | 18.9 | Indo-European    |
| 54    | P1053     | Kapha    | 66                 | V25                 | P9                 | Male   | 26.1 | Indo-European    |
| 55    | P1055     | Kapha    | 63                 | V25                 | P12                | Male   | 26.2 | Indo-European    |
| 56    | P1087     | Kapha    | 62                 | P24                 | V14                | Male   | 25.2 | Indo-European    |
| 57    | P1096     | Kapha    | 70                 | P22                 | V8                 | Male   | -    | -                |
| 58    | P1099     | Kapha    | 61                 | P21                 | V18                | Male   | 23.3 | Indo-European    |
| 59    | P1100     | Kapha    | 63                 | P22                 | V15                | Male   | 25.1 | Indo-European    |
| 60    | P1111     | Kapha    | 67                 | P23                 | V10                | Male   | 23.5 | Indo-European    |
| 61    | P1115     | Kapha    | 63                 | V23                 | P14                | Male   | 19.8 | Indo-European    |

|     |       |       |    |     |     |      |       |               |
|-----|-------|-------|----|-----|-----|------|-------|---------------|
| 62  | P1142 | Kapha | 63 | V23 | P14 | Male | 24.3  | Indo-European |
| 63  | P1159 | Kapha | 63 | P19 | V18 | Male | 21.6  | Indo-European |
| 64  | P1164 | Kapha | 61 | P21 | V13 | Male | 23.5  | Indo-European |
| 65  | P1183 | Kapha | 63 | P31 | V6  | Male | 23.4  | Indo-European |
| 66  | P1210 | Kapha | 62 | P20 | V18 | Male | 20.7  | Indo-European |
| 67  | P1252 | Kapha | 66 | V21 | P13 | Male | 26.3  | Indo-European |
| 68  | P1256 | Kapha | 64 | V23 | P13 | Male | 26.8  | Indo-European |
| 69  | P018  | Kapha | 75 | P18 | V7  | Male | 24.1  | Indo-European |
| 70  | U012  | Kapha | 71 | V15 | P14 | Male | 24.48 | Dravidian     |
| 71  | U015  | Kapha | 72 | P22 | V6  | Male | 24.39 | Dravidian     |
| 72  | U020  | Kapha | 76 | V14 | P10 | Male | 25.2  | Dravidian     |
| 73  | U040  | Kapha | 79 | P15 | V6  | Male | 23.93 | Dravidian     |
| 74  | U051  | Kapha | 63 | P28 | V9  | Male | 20.6  | Indo-European |
| 75  | U070  | Kapha | 75 | P13 | V12 | Male | 23.72 | Dravidian     |
| 76  | U071  | Kapha | 61 | P21 | V18 | Male | 23.93 | Dravidian     |
| 77  | U078  | Kapha | 60 | P21 | V19 | Male | 23.03 | Dravidian     |
| 78  | U083  | Kapha | 60 | P24 | V16 | Male | 23.19 | Dravidian     |
| 79  | U104  | Kapha | 70 | P21 | V9  | Male | 25.39 | Dravidian     |
| 80  | U113  | Kapha | 73 | P18 | V9  | Male | 23.93 | Dravidian     |
| 81  | U149  | Kapha | 75 | P14 | V11 | Male | 26.29 | Dravidian     |
| 82  | U150  | Kapha | 75 | P13 | V12 | Male | 22.53 | Dravidian     |
| 83  | U161  | Kapha | 73 | P20 | V7  | Male | 21.67 | Indo-European |
| 84  | U168  | Kapha | 62 | P24 | V14 | Male | 23.38 | Dravidian     |
| 85  | U187  | Kapha | 70 | P21 | V9  | Male | 22.09 | Dravidian     |
| 86  | U191  | Kapha | 74 | P15 | V11 | Male | 26.12 | Dravidian     |
| 87  | U206  | Kapha | 61 | P24 | V15 | Male | 21.63 | Indo-European |
| 88  | U210  | Kapha | 64 | P26 | V10 | Male | 22.22 | Dravidian     |
| 89  | U271  | Kapha | 72 | P19 | V9  | Male | 24.81 | Dravidian     |
| 90  | B019  | Pitta | 72 | V17 | K11 | Male | 19.4  | -             |
| 91  | B024  | Pitta | 67 | K21 | V12 | Male | 23.1  | -             |
| 92  | B034  | Pitta | 67 | V24 | K9  | Male | 21.7  | Indo-European |
| 93  | B041  | Pitta | 78 | K15 | V7  | Male | 22.1  | Indo-European |
| 94  | B046  | Pitta | 60 | K36 | V4  | Male | 25.6  | Indo-European |
| 95  | B048  | Pitta | 76 | K15 | V9  | Male | 26.6  | Dravidian     |
| 96  | B055  | Pitta | 84 | K10 | V6  | Male | 23.5  | Dravidian     |
| 97  | B060  | Pitta | 82 | K10 | V8  | Male | 20.2  | Dravidian     |
| 98  | B061  | Pitta | 80 | V12 | K8  | Male | 17.17 | Dravidian     |
| 99  | B065  | Pitta | 78 | V26 | K6  | Male | 22.9  | Indo-European |
| 100 | B070  | Pitta | 82 | K10 | V8  | Male | 18    | Dravidian     |
| 101 | B073  | Pitta | 90 | K6  | V4  | Male | 21.6  | Dravidian     |
| 102 | B074  | Pitta | 78 | V12 | K10 | Male | 24.2  | Indo-European |
| 103 | B076  | Pitta | 68 | K20 | V12 | Male | 22.7  | Indo-European |
| 104 | B083  | Pitta | 82 | K12 | V6  | Male | 20.2  | Indo-European |
| 105 | B085  | Pitta | 80 | K12 | V8  | Male | 26.7  | Dravidian     |
| 106 | B097  | Pitta | 80 | K12 | V8  | Male | 21.7  | Indo-European |
| 107 | B100  | Pitta | 82 | V10 | K8  | Male | 31.7  | Dravidian     |
| 108 | B102  | Pitta | 62 | K20 | V18 | Male | 25.1  | Dravidian     |
| 109 | B115  | Pitta | 78 | V12 | K10 | Male | 22.8  | Dravidian     |
| 110 | B121  | Pitta | 86 | V8  | K6  | Male | 15    | Dravidian     |
| 111 | B129  | Pitta | 83 | K12 | V5  | Male | 29.4  | Dravidian     |
| 112 | B135  | Pitta | 82 | V10 | K8  | Male | 20.1  | Dravidian     |
| 113 | B140  | Pitta | 76 | V14 | K10 | Male | 21.2  | Indo-European |
| 114 | B147  | Pitta | 76 | K14 | V10 | Male | 18.9  | Dravidian     |
| 115 | B148  | Pitta | 84 | V10 | K6  | Male | 20.4  | Dravidian     |
| 116 | B149  | Pitta | 82 | V12 | K6  | Male | 20.8  | Dravidian     |
| 117 | B154  | Pitta | 76 | K14 | V10 | Male | 29.6  | Indo-European |
| 118 | B156  | Pitta | 77 | K13 | V10 | Male | 20.3  | Dravidian     |
| 119 | B162  | Pitta | 84 | V10 | K6  | Male | 17.3  | Indo-European |
| 120 | B166  | Pitta | 76 | K14 | V10 | Male | 21.5  | Dravidian     |
| 121 | B169  | Pitta | 83 | V12 | K5  | Male | 20    | Dravidian     |
| 122 | B187  | Pitta | 74 | K17 | V9  | Male | 27.9  | Indo-European |
| 123 | B191  | Pitta | 69 | K17 | V14 | Male | 20.5  | Dravidian     |
| 124 | B254  | Pitta | 61 | K20 | V19 | Male | 26.5  | Dravidian     |
| 125 | B282  | Pitta | 60 | V23 | K17 | Male | 20.2  | Indo-European |
| 126 | P1069 | Pitta | 62 | V18 | K20 | Male | 20.2  | -             |
| 127 | P700  | Pitta | 65 | K20 | V15 | Male | 23.7  | Indo-European |
| 128 | P788  | Pitta | 62 | K20 | V18 | Male | 19.8  | Indo-European |

|     |       |       |    |     |     |      |       |               |
|-----|-------|-------|----|-----|-----|------|-------|---------------|
| 129 | P061  | Pitta | 62 | V21 | K17 | Male | 18.1  | Indo-European |
| 130 | P535  | Pitta | 64 | K31 | V5  | Male | 23    | Indo-European |
| 131 | P700  | Pitta | 65 | K20 | V15 | Male | 23.7  | Indo-European |
| 132 | P706  | Pitta | 66 | K22 | V12 | Male | 21.5  | Indo-European |
| 133 | P766  | Pitta | 63 | K33 | V4  | Male | 22.6  | Indo-European |
| 134 | P788  | Pitta | 62 | K20 | V18 | Male | 19.8  | Indo-European |
| 135 | P829  | Pitta | 63 | K29 | V8  | Male | 21    | Indo-European |
| 136 | P835  | Pitta | 63 | K28 | V9  | Male | 24.1  | Indo-European |
| 137 | P905  | Pitta | 64 | K20 | V16 | Male | 24.6  | Indo-European |
| 138 | P862  | Pitta | 64 | V19 | K17 | Male | 16.6  | Indo-European |
| 139 | P882  | Pitta | 63 | V20 | P17 | Male | 18.4  | Indo-European |
| 140 | P1165 | Pitta | 62 | K20 | V18 | Male | 18.7  | Indo-European |
| 141 | P1191 | Pitta | 60 | K24 | V16 | Male | 17    | Indo-European |
| 142 | P1234 | Pitta | 62 | K30 | V8  | Male | 21.3  | Indo-European |
| 143 | P103  | Pitta | 62 | V21 | K17 | Male | 19.6  | Indo-European |
| 144 | P801  | Pitta | 63 | V24 | K13 | Male | 19.5  | Indo-European |
| 145 | U034  | Pitta | 71 | K22 | V7  | Male | 23.8  | Indo-European |
| 146 | U048  | Pitta | 64 | K29 | V7  | Male | 19.37 | Dravidian     |
| 147 | U052  | Pitta | 71 | V15 | K14 | Male | 21.7  | Dravidian     |
| 148 | U181  | Pitta | 63 | K29 | V8  | Male | 21.35 | Dravidian     |
| 149 | U190  | Pitta | 61 | K28 | V11 | Male | 20.82 | Dravidian     |
| 150 | U193  | Pitta | 65 | K24 | V11 | Male | 22.3  | Dravidian     |
| 151 | U194  | Pitta | 62 | V22 | K16 | Male | 18.16 | Dravidian     |
| 152 | U195  | Pitta | 61 | K26 | V13 | Male | 23.78 | Dravidian     |
| 153 | U221  | Pitta | 63 | V19 | K18 | Male | 19.46 | Dravidian     |
| 154 | U222  | Pitta | 65 | K24 | V11 | Male | 20.02 | Dravidian     |
| 155 | U223  | Pitta | 62 | K26 | V12 | Male | 19.71 | Dravidian     |
| 156 | U226  | Pitta | 67 | K17 | V16 | Male | 19.46 | Dravidian     |
| 157 | U238  | Pitta | 64 | K23 | V13 | Male | 16.79 | Dravidian     |
| 158 | U272  | Pitta | 63 | V21 | K16 | Male | 20.31 | Dravidian     |
| 159 | U288  | Pitta | 63 | V19 | K18 | Male | 20.76 | Dravidian     |
| 160 | U303  | Pitta | 63 | V25 | K12 | Male | 20.76 | Dravidian     |
| 161 | U315  | Pitta | 63 | K19 | V18 | Male | 20.19 | Dravidian     |
| 162 | B114  | Vata  | 86 | P12 | K2  | Male | 22.9  | Dravidian     |
| 163 | B033  | Vata  | 75 | P15 | K10 | Male | 15.6  | Dravidian     |
| 164 | B038  | Vata  | 80 | K14 | P6  | Male | 17.7  | Indo-European |
| 165 | B045  | Vata  | 82 | P12 | K6  | Male | 20.1  | Dravidian     |
| 166 | B047  | Vata  | 79 | P13 | K8  | Male | -     | Dravidian     |
| 167 | B052  | Vata  | 73 | K15 | P12 | Male | 20.5  | Dravidian     |
| 168 | B062  | Vata  | 84 | P9  | K7  | Male | 21.3  | Dravidian     |
| 169 | B063  | Vata  | 82 | K10 | V8  | Male | 24.2  | Dravidian     |
| 170 | B071  | Vata  | 78 | P12 | K10 | Male | 17.9  | Dravidian     |
| 171 | B077  | Vata  | 76 | P14 | K10 | Male | 21    | Dravidian     |
| 172 | B078  | Vata  | 84 | K10 | P6  | Male | 22.7  | Dravidian     |
| 173 | B081  | Vata  | 78 | K14 | P8  | Male | 20.6  | Dravidian     |
| 174 | B084  | Vata  | 76 | P14 | K10 | Male | 21.1  | Indo-European |
| 175 | B089  | Vata  | 82 | P12 | K6  | Male | 20.2  | Dravidian     |
| 176 | B099  | Vata  | 76 | K16 | P8  | Male | 20.5  | Dravidian     |
| 177 | B103  | Vata  | 84 | P10 | K6  | Male | 21.5  | Indo-European |
| 178 | B107  | Vata  | 82 | P12 | K6  | Male | 15.4  | Indo-European |
| 179 | B119  | Vata  | 76 | P12 | K12 | Male | 18.5  | Dravidian     |
| 180 | B120  | Vata  | 82 | K10 | P8  | Male | 18.1  | Dravidian     |
| 181 | B123  | Vata  | 76 | P14 | K10 | Male | 20.3  | Indo-European |
| 182 | B126  | Vata  | 78 | P12 | K10 | Male | 19    | Dravidian     |
| 183 | B143  | Vata  | 72 | P18 | K10 | Male | 23.3  | Dravidian     |
| 184 | B160  | Vata  | 76 | P18 | K6  | Male | 16.1  | Dravidian     |
| 185 | B168  | Vata  | 82 | K10 | P8  | Male | 19.8  | Dravidian     |
| 186 | B190  | Vata  | 78 | K13 | P9  | Male | 17.6  | Dravidian     |
| 187 | B193  | Vata  | 79 | K18 | P3  | Male | 20    | Dravidian     |
| 188 | B199  | Vata  | 75 | P17 | K8  | Male | 23.4  | Dravidian     |
| 189 | B210  | Vata  | 73 | P14 | K13 | Male | 21.5  | Dravidian     |
| 190 | B212  | Vata  | 67 | K26 | P7  | Male | 21.5  | -             |
| 191 | B244  | Vata  | 60 | P25 | K15 | Male | 20.1  | Indo-European |
| 192 | B247  | Vata  | 60 | K29 | P11 | Male | 18.1  | Indo-European |
| 193 | B255  | Vata  | 67 | P19 | K14 | Male | 20.2  | Dravidian     |
| 194 | B259  | Vata  | 64 | K23 | P13 | Male | 18.1  | Dravidian     |
| 195 | B261  | Vata  | 60 | K24 | P16 | Male | 20.2  | Dravidian     |

|     |       |       |    |      |     |      |       |               |
|-----|-------|-------|----|------|-----|------|-------|---------------|
| 196 | B264  | Vata  | 60 | P23  | K17 | Male | 19.3  | Indo-European |
| 197 | B266  | Vata  | 60 | K33  | P7  | Male | 25.8  | Indo-European |
| 198 | B271  | Vata  | 60 | K26  | P14 | Male | 18.1  | Dravidian     |
| 199 | B289  | Vata  | 60 | K21  | P19 | Male | 17.3  | -             |
| 200 | P1004 | Vata  | 68 | K26  | P6  | Male | 16.9  | Indo-European |
| 201 | P1031 | Vata  | 65 | P24  | K11 | Male | 19.1  | Dravidian     |
| 202 | P1040 | Vata  | 66 | K30  | P4  | Male | 17.9  | Indo-European |
| 203 | P1073 | Vata  | 65 | K19  | P16 | Male | 20.2  | Indo-European |
| 204 | P335  | Vata  | 72 | P17  | K11 | Male | 16.7  | Indo-European |
| 205 | P421  | Vata  | 73 | K15  | V13 | Male | 20.9  | Indo-European |
| 206 | P452  | Vata  | 71 | P18  | K11 | Male | 18.3  | Indo-European |
| 207 | P487  | Vata  | 73 | K17  | P10 | Male | 19.1  | Indo-European |
| 208 | P606  | Vata  | 69 | K22  | P9  | Male | 19.1  | Indo-European |
| 209 | P653  | Vata  | 72 | K21  | V7  | Male | 16.4  | Indo-European |
| 210 | P707  | Vata  | 69 | P21  | K10 | Male | 22.2  | Indo-European |
| 211 | P728  | Vata  | 71 | K17  | P12 | Male | 18.5  | Indo-European |
| 212 | P776  | Vata  | 74 | K18  | V8  | Male | 20    | Dravidian     |
| 213 | P810  | Vata  | 68 | K27  | P5  | Male | 24.1  | Indo-European |
| 214 | P1023 | Vata  | 64 | K28  | P8  | Male | 16.5  | Indo-European |
| 215 | P1033 | Vata  | 64 | K23  | P13 | Male | 15.4  | Indo-European |
| 216 | P1036 | Vata  | 62 | K24  | P14 | Male | 22    | Indo-European |
| 217 | P1040 | Vata  | 66 | K30  | P4  | Male | 17.9  | Indo-European |
| 218 | P993  | Vata  | 66 | K24  | P10 | Male | 18    | Indo-European |
| 219 | P1047 | Vata  | 63 | K28  | P9  | Male | 27.1  | Indo-European |
| 220 | P1048 | Vata  | 64 | K21  | P15 | Male | 23.1  | Indo-European |
| 221 | P1049 | Vata  | 62 | P21  | P17 | Male | 17.7  | Indo-European |
| 222 | P1062 | Vata  | 62 | K26  | P12 | Male | 21.1  | Indo-European |
| 223 | P1083 | Vata  | 69 | K20  | P11 | Male | 22.3  | Indo-European |
| 224 | P1093 | Vata  | 66 | P21  | K13 | Male | 21.4  | Indo-European |
| 225 | P1094 | Vata  | 63 | K22  | P15 | Male | -     | -             |
| 226 | P1101 | Vata  | 65 | K24  | P11 | Male | 20.7  | Indo-European |
| 227 | P1105 | Vata  | 67 | K34  | P9  | Male | 19.7  | Indo-European |
| 228 | P1107 | Vata  | 62 | K25  | P13 | Male | 24    | Indo-European |
| 229 | P1108 | Vata  | 66 | K26  | P8  | Male | 19    | Indo-European |
| 230 | P1114 | Vata  | 63 | K28  | P9  | Male | 19.8  | Indo-European |
| 231 | P1126 | Vata  | 63 | K32  | P5  | Male | 27.3  | Indo-European |
| 232 | P1128 | Vata  | 60 | K23  | P17 | Male | 17.9  | Indo-European |
| 233 | P1133 | Vata  | 67 | K24  | P9  | Male | 22.8  | Indo-European |
| 234 | P1135 | Vata  | 62 | K27  | P11 | Male | 19    | Indo-European |
| 235 | P1149 | Vata  | 66 | K27  | P7  | Male | 19.1  | Indo-European |
| 236 | P1181 | Vata  | 60 | K27  | P13 | Male | 19.5  | Indo-European |
| 237 | P1258 | Vata  | 61 | K20  | P19 | Male | 17.6  | Indo-European |
| 238 | P1259 | Vata  | 61 | k20  | P19 | Male | 21.3  | Indo-European |
| 239 | P055  | Vata  | 79 | P16  | K5  | Male | 15.8  | Indo-European |
| 240 | P183  | Vata  | 73 | P15  | K12 | Male | 18.3  | Indo-European |
| 241 | P214  | Vata  | 78 | K 14 | P8  | Male | 17.7  | Indo-European |
| 242 | U014  | Vata  | 63 | P22  | K15 | Male | 20.2  | Dravidian     |
| 243 | U049  | Vata  | 64 | K21  | P15 | Male | 14.01 | Dravidian     |
| 244 | U076  | Vata  | 65 | K20  | P15 | Male | 16.33 | Dravidian     |
| 245 | U114  | Vata  | 63 | K23  | P14 | Male | 17.99 | Dravidian     |
| 246 | U120  | Vata  | 63 | K25  | P12 | Male | 20.81 | Dravidian     |
| 247 | U124  | Vata  | 64 | K22  | P14 | Male | 17.48 | Dravidian     |
| 248 | U146  | Vata  | 66 | K19  | P15 | Male | 19.85 | Dravidian     |
| 249 | U165  | Vata  | 62 | K22  | P16 | Male | 22.38 | Dravidian     |
| 250 | U202  | Vata  | 65 | P21  | K14 | Male | 19.83 | Dravidian     |
| 251 | U247  | Vata  | 67 | K20  | P13 | Male | 17.95 | Dravidian     |
| 252 | U309  | Vata  | 60 | P25  | K15 | Male | 20.06 | Dravidian     |
| 253 | B101  | Pitta | 80 | V10  | K10 | Male | 31.7  | Dravidian     |
| 254 | B102  | Pitta | 62 | K20  | V18 | Male | 25.1  | Dravidian     |
| 255 | B131  | Pitta | 68 | K20  | V12 | Male | 25.0  | Dravidian     |
| 256 | B202  | Kapha | 93 | V6   | P1  | Male | 23.9  | Dravidian     |
| 257 | B287  | Vata  | 70 | K20  | P10 | Male | 22.0  | Dravidian     |
| 258 | B288  | Kapha | 68 | P18  | V14 | Male | 22.9  | Dravidian     |
| 259 | U009  | Kapha | 71 | P23  | V6  | Male | 28.72 | Indo-European |
| 260 | U056  | Pitta | 64 | K31  | V5  | Male | 22.73 | Indo-European |
| 261 | U069  | Kapha | 70 | P19  | V11 | Male | 24.09 | Indo-European |
| 262 | U101  | Vata  | 64 | K30  | P6  | Male | 19.88 | Dravidian     |





**Table S3.** The list of randomly selected 48 markers from Affymetrix SNP (6.0) array for validation of 48 known genotyped individuals using custom-designed VeraCode GoldenGate Genotyping.

| S. No | rsID       | Chr | Position  | % of genotype not matching (no of individuals) | % of genotype matching (no of individuals) | % of genotype not called |
|-------|------------|-----|-----------|------------------------------------------------|--------------------------------------------|--------------------------|
| 1     | rs12060189 | 1   | 40932868  | 0 (0)                                          | 1 (48)                                     | 0 (0)                    |
| 2     | rs10489167 | 1   | 40949053  | 0 (0)                                          | 1 (48)                                     | 0 (0)                    |
| 3     | rs2744803  | 1   | 40955692  | 0 (0)                                          | 1 (48)                                     | 0 (0)                    |
| 4     | rs823681   | 1   | 41004011  | 0 (0)                                          | 1 (48)                                     | 0 (0)                    |
| 5     | rs6713149  | 2   | 2441676   | 0 (0)                                          | 1 (48)                                     | 0 (0)                    |
| 6     | rs4853937  | 2   | 2443758   | 0 (0)                                          | 1 (48)                                     | 0 (0)                    |
| 7     | rs11127348 | 2   | 2473921   | 0 (0)                                          | 1 (48)                                     | 0 (0)                    |
| 8     | rs6748662  | 2   | 57710603  | 0 (0)                                          | 1 (48)                                     | 0 (0)                    |
| 9     | rs6733573  | 2   | 204840871 | 0 (0)                                          | 1 (48)                                     | 0 (0)                    |
| 10    | rs12490846 | 3   | 61700707  | 0 (0)                                          | 1 (48)                                     | 0 (0)                    |
| 11    | rs10511210 | 3   | 104538562 | 0.0208 (1)                                     | 0.9791 (47)                                | 0 (0)                    |
| 12    | rs16870624 | 4   | 20864143  | 0 (0)                                          | 1 (48)                                     | 0 (0)                    |
| 13    | rs17627904 | 4   | 25584319  | 0 (0)                                          | 1 (48)                                     | 0 (0)                    |
| 14    | rs17797407 | 4   | 56485560  | 0 (0)                                          | 1 (48)                                     | 0 (0)                    |
| 15    | rs7665845  | 4   | 162413989 | 0.0208(1)                                      | 0.9791(47)                                 | 0 (0)                    |
| 16    | rs4699948  | 5   | 59312197  | 0 (0)                                          | 1 (48)                                     | 0 (0)                    |
| 17    | rs152270   | 5   | 141123895 | 0 (0)                                          | 1 (48)                                     | 0 (0)                    |
| 18    | rs248478   | 5   | 141139422 | 0 (0)                                          | 1 (48)                                     | 0 (0)                    |
| 19    | rs429946   | 5   | 141164104 | 0.0208 (1)                                     | 0.9791 (47)                                | 0 (0)                    |
| 20    | rs790607   | 6   | 91163700  | 0 (0)                                          | 1 (48)                                     | 0 (0)                    |
| 21    | rs2717983  | 7   | 37300345  | 0 (0)                                          | 1 (48)                                     | 0 (0)                    |
| 22    | rs41028    | 7   | 103930457 | 0 (0)                                          | 1 (48)                                     | 0 (0)                    |
| 23    | rs41038    | 7   | 103933117 | 0 (0)                                          | 1 (48)                                     | 0 (0)                    |
| 24    | rs10231685 | 7   | 103963525 | 0 (0)                                          | 1 (48)                                     | 0 (0)                    |
| 25    | rs13231181 | 7   | 103979084 | 0 (0)                                          | 1 (48)                                     | 0 (0)                    |
| 26    | rs6969323  | 7   | 104001723 | 0 (0)                                          | 1 (48)                                     | 0 (0)                    |
| 27    | rs17077609 | 8   | 6430547   | 0 (0)                                          | 1 (48)                                     | 0 (0)                    |
| 28    | rs6996364  | 8   | 69154894  | 0 (0)                                          | 0.9791 (47)                                | 0.0208 (1)               |
| 29    | rs9299502  | 10  | 70546940  | 0.0208 (1)                                     | 0.9791 (47)                                | 0 (0)                    |
| 30    | rs2803545  | 10  | 88396950  | 0 (0)                                          | 1 (48)                                     | 0 (0)                    |
| 31    | rs1147644  | 10  | 95390937  | 0 (0)                                          | 1 (48)                                     | 0 (0)                    |
| 32    | rs913046   | 10  | 95398474  | 0 (0)                                          | 1 (48)                                     | 0 (0)                    |
| 33    | rs6583901  | 10  | 95399988  | 0 (0)                                          | 1 (48)                                     | 0 (0)                    |
| 34    | rs12772131 | 10  | 95461814  | 0 (0)                                          | 1 (48)                                     | 0 (0)                    |
| 35    | rs3809101  | 11  | 1923847   | 0 (0)                                          | 1 (48)                                     | 0 (0)                    |
| 36    | rs11600982 | 11  | 1932882   | 0.0208 (1)                                     | 0.9791 (47)                                | 0 (0)                    |
| 37    | rs10769945 | 11  | 1941703   | 0.0208 (1)                                     | 0.9791 (47)                                | 0 (0)                    |
| 38    | rs3751176  | 12  | 127241860 | 0.0208 (1)                                     | 0.9791 (47)                                | 0 (0)                    |
| 39    | rs11157525 | 14  | 46288404  | 0 (0)                                          | 1 (48)                                     | 0 (0)                    |
| 40    | rs11848659 | 14  | 46293695  | 0 (0)                                          | 1 (48)                                     | 0 (0)                    |
| 41    | rs2105269  | 14  | 68816987  | 0 (0)                                          | 1 (48)                                     | 0 (0)                    |
| 42    | rs4902778  | 14  | 69649989  | 0 (0)                                          | 1 (48)                                     | 0 (0)                    |
| 43    | rs7162785  | 15  | 91094879  | 0 (0)                                          | 1 (48)                                     | 0 (0)                    |
| 44    | rs11247168 | 15  | 98578034  | 0 (0)                                          | 1 (48)                                     | 0 (0)                    |
| 45    | rs4789092  | 17  | 70203226  | 0.0208 (1)                                     | 0.9791 (47)                                | 0 (0)                    |
| 46    | rs1077053  | 20  | 30663242  | 0 (0)                                          | 1 (48)                                     | 0 (0)                    |
| 47    | rs2835193  | 21  | 36268715  | 0 (0)                                          | 1 (48)                                     | 0 (0)                    |
| 48    | rs2835216  | 21  | 36285255  | 0 (0)                                          | 1 (48)                                     | 0 (0)                    |

**Table S4.** Genotype imputation of 2%, 5% and 10% masked data with different reference populations (India, HapMap and India+HapMap) and their concordance frequency.

| Simulation | 2% mask data (concordance frequency) |             |                   |                                       | 5% mask data (concordance frequency) |             |                   |                                       | 10% mask data (concordance frequency) |             |                   |                                       |
|------------|--------------------------------------|-------------|-------------------|---------------------------------------|--------------------------------------|-------------|-------------------|---------------------------------------|---------------------------------------|-------------|-------------------|---------------------------------------|
|            | India (IN)                           | HapMap (HM) | India+HapMap (IH) | 1000 genome proj. - South-Asians (SA) | India (IN)                           | HapMap (HM) | India+HapMap (IH) | 1000 genome proj. - South-Asians (SA) | India (IN)                            | HapMap (HM) | India+HapMap (IH) | 1000 genome proj. - South-Asians (SA) |
| 1st        | 0.951330459                          | 0.948937737 | 0.948280395       | 0.949794864                           | 0.95073382                           | 0.943192969 | 0.944974188       | 0.947707348                           | 0.948816529                           | 0.940164723 | 0.942259314       | 0.94384211                            |
| 2nd        | 0.951863232                          | 0.944536359 | 0.944956538       | 0.948337689                           | 0.950245628                          | 0.943649364 | 0.944949436       | 0.947475941                           | 0.946401719                           | 0.938915895 | 0.941332794       | 0.94487523                            |
| 3rd        | 0.952389701                          | 0.945723209 | 0.945828193       | 0.949200462                           | 0.94990249                           | 0.948163587 | 0.945363422       | 0.946516295                           | 0.94642584                            | 0.938645949 | 0.940803995       | 0.94298547                            |
| 4th        | 0.952344714                          | 0.945994174 | 0.947647414       | 0.947084332                           | 0.950430667                          | 0.942883336 | 0.944066604       | 0.948107471                           | 0.947232722                           | 0.940104224 | 0.941819433       | 0.94467963                            |
| 5th        | 0.951133647                          | 0.94516985  | 0.945747839       | 0.948545929                           | 0.949526074                          | 0.942946621 | 0.945249175       | 0.944344858                           | 0.947550272                           | 0.940470732 | NA                | 0.944215615                           |
| 6th        | 0.950966253                          | 0.945590896 | 0.946534861       | 0.949032219                           | 0.951297975                          | 0.94493859  | 0.945343375       | 0.947600831                           | 0.947660929                           | 0.939608344 | 0.941737502       | 0.943756911                           |
| 7th        | 0.951654078                          | 0.945943101 | 0.946706319       | 0.950355688                           | 0.951453516                          | 0.944396474 | 0.945963521       | 0.9459353                             | 0.947956956                           | 0.940232287 | 0.941211548       | 0.941635472                           |
| 8th        | 0.95214682                           | 0.945520995 | 0.945547288       | 0.948900682                           | 0.950964827                          | 0.943016057 | 0.94544544        | 0.947449369                           | 0.947523537                           | 0.938894801 | 0.94134534        | 0.943096066                           |
| 9th        | 0.951490479                          | 0.944924491 | 0.946237689       | 0.949304145                           | 0.949855969                          | 0.94318788  | 0.943614638       | 0.94691844                            | 0.947550709                           | 0.939662284 | 0.941645316       | 0.943706757                           |
| 10th       | 0.951990324                          | 0.944681075 | 0.945837934       | 0.949192106                           | 0.949135007                          | 0.941807632 | 0.94332217        | 0.947997587                           | 0.947700952                           | 0.939114704 | 0.942093383       | 0.944512862                           |
| 11th       | 0.952354702                          | 0.947183283 | 0.947367039       | 0.946834982                           | 0.950930644                          | 0.94292476  | 0.944555785       | 0.94714827                            | 0.94781849                            | 0.940779774 | 0.942166767       | 0.943066331                           |
| 12th       | 0.950539781                          | 0.945496572 | 0.944708571       | 0.949880089                           | 0.949561824                          | 0.943069149 | 0.944188575       | 0.947506303                           | 0.947704772                           | 0.939717805 | 0.941357839       | 0.944972301                           |
| 13th       | 0.950464884                          | 0.942585491 | 0.943268372       | 0.9468386                             | 0.951002655                          | 0.943273526 | 0.946045351       | 0.945784766                           | 0.948994375                           | 0.939859284 | 0.942887913       | 0.94366507                            |
| 14th       | 0.950637695                          | 0.946622579 | 0.947016218       | 0.947656559                           | 0.951827384                          | 0.945490374 | 0.947375883       | 0.945770893                           | 0.947701749                           | 0.939785216 | 0.941051861       | 0.944326411                           |
| 15th       | 0.953131154                          | 0.945989235 | 0.947039517       | 0.948803595                           | 0.951064533                          | 0.943505656 | 0.945296758       | 0.947549907                           | 0.947867532                           | 0.93967435  | 0.942385369       | 0.943734273                           |
| 16th       | 0.952325917                          | 0.944918705 | 0.943526569       | 0.947394087                           | 0.95061847                           | 0.943958847 | 0.944684575       | 0.947333473                           | 0.947995299                           | 0.939593867 | 0.942337861       | 0.943822134                           |
| 17th       | 0.951144597                          | 0.946025412 | 0.945631629       | 0.947732864                           | 0.949601585                          | 0.943433612 | 0.944765212       | 0.948186528                           | 0.946968745                           | 0.938724781 | 0.94116683        | 0.943856538                           |
| 18th       | 0.950341387                          | 0.946769958 | 0.946323529       | 0.946786203                           | 0.950588963                          | 0.943173573 | 0.944571294       | 0.94541224                            | 0.947742612                           | 0.938885613 | 0.941643186       | 0.944537731                           |
| 19th       | 0.952583603                          | 0.949168571 | 0.948117792       | 0.947609792                           | 0.952873916                          | 0.94724692  | 0.94986203        | 0.947509763                           | 0.9476191                             | 0.940534842 | 0.942610415       | 0.943976112                           |
| 20th       | 0.951543469                          | 0.946424822 | 0.945794834       | 0.950414478                           | 0.949269104                          | 0.941016537 | 0.944023286       | 0.947401493                           | 0.947431968                           | 0.940160294 | 0.941848459       | 0.944341758                           |
| 21st       | 0.953079872                          | 0.947618547 | 0.948012393       | 0.945890931                           | 0.948871394                          | 0.941169568 | 0.936475934       | 0.9457487                             | 0.947820907                           | 0.939797558 | 0.942175049       | 0.944325751                           |
| 22nd       | 0.950999711                          | 0.946664565 | 0.945718715       | 0.949040713                           | 0.94984062                           | 0.942921717 | 0.943795908       | 0.946763937                           | 0.94857146                            | 0.939417442 | 0.94252522        | 0.945703009                           |
| 23rd       | 0.951310468                          | 0.945926782 | 0.946031829       | 0.947881845                           | 0.950062382                          | 0.943930815 | 0.945594335       | 0.947259845                           | 0.948212118                           | 0.940232551 | 0.942677284       | 0.943587777                           |
| 24th       | 0.951339286                          | 0.945063025 | 0.947111345       | 0.949379005                           | 0.950555781                          | 0.943429839 | 0.944944635       | 0.947804331                           | 0.947798206                           | 0.940260435 | 0.941975551       | 0.94467946                            |
| 25th       | 0.950723648                          | 0.946442174 | 0.945890573       | 0.950109316                           | 0.951890584                          | 0.94362894  | 0.945760977       | 0.94715687                            | 0.94808325                            | 0.940464349 | 0.941562913       | 0.943935229                           |
| 26th       | 0.949868766                          | 0.944173228 | 0.945800525       | 0.948355093                           | 0.950783284                          | 0.943387971 | 0.945340846       | 0.948218949                           | 0.947968697                           | 0.939634726 | 0.941924519       | 0.943810194                           |

|      |             |             |             |             |             |             |             |             |             |             |             |             |
|------|-------------|-------------|-------------|-------------|-------------|-------------|-------------|-------------|-------------|-------------|-------------|-------------|
| 27th | 0.95150528  | 0.946146167 | 0.944097095 | 0.948475193 | 0.949792933 | 0.942755853 | 0.944618922 | 0.947442867 | 0.94751505  | 0.938802154 | 0.94248943  | 0.943276268 |
| 28th | 0.952910039 | 0.947223605 | 0.947040172 | 0.949867994 | 0.948920204 | 0.942236766 | 0.943974247 | 0.948439002 | 0.947784827 | 0.940430039 | 0.94266323  | 0.944046272 |
| 29th | 0.952079613 | 0.944858733 | 0.945672723 | 0.949492802 | 0.95054353  | 0.942979976 | 0.944718847 | 0.946606903 | 0.947610877 | 0.939528733 | 0.941594352 | 0.943640882 |
| 30th | 0.952305956 | 0.946189989 | 0.946294984 | 0.946478531 | 0.950348181 | 0.942371472 | 0.944408305 | 0.948639703 | 0.947684073 | 0.939310684 | 0.941429976 | 0.944605827 |
| 31st | 0.950701266 | 0.944213899 | 0.944870515 | 0.947657316 | 0.950630442 | 0.941933215 | 0.944992166 | 0.947427472 | 0.946948601 | 0.938961074 | 0.940925131 | 0.944370078 |
| 32nd | 0.951885702 | 0.946186574 | 0.945635046 | 0.949097879 | 0.949267253 | 0.944432816 | 0.94397291  | 0.947828331 | 0.948180527 | 0.939760682 | 0.941744072 | 0.944787473 |
| 33rd | 0.952687438 | 0.94654022  | 0.946776651 | 0.949282413 | 0.952557975 | 0.944547708 | 0.946878504 | 0.948005417 | 0.947460442 | 0.93957623  | 0.941674316 | 0.944307445 |
| 34th | 0.950751208 | 0.944841353 | 0.946154654 | 0.946957973 | 0.952590015 | 0.945341838 | 0.947371328 | 0.947737036 | 0.947656459 | 0.939078329 | 0.941243364 | 0.943476867 |
| 35th | 0.951367223 | 0.944550769 | 0.945415935 | 0.94826644  | 0.949401808 | 0.9417283   | 0.942560753 | 0.948794625 | 0.946818167 | 0.938621625 | 0.941153312 | 0.943961966 |
| 36th | 0.954613506 | 0.948178499 | 0.948677541 | 0.948292653 | 0.950555544 | 0.943784522 | 0.944648227 | 0.948268864 | 0.947411268 | 0.939816636 | 0.942116881 | 0.94387723  |
| 37th | 0.951683594 | 0.94562108  | 0.946434664 | 0.946839822 | 0.950883355 | 0.944593444 | 0.9449553   | 0.947995466 | 0.947941254 | 0.940849288 | 0.942248011 | 0.943718833 |
| 38th | 0.952188411 | 0.946622207 | 0.946595951 | 0.946085425 | 0.94993602  | 0.942482406 | 0.944071231 | 0.946095191 | 0.94709336  | 0.938860523 | 0.940932399 | 0.944089427 |
| 39th | 0.95271762  | 0.94612069  | 0.947119428 | 0.947304517 | 0.949872096 | 0.942315071 | 0.944254956 | 0.946978567 | 0.946728829 | 0.938998559 | 0.940881993 | 0.944372883 |
| 40th | 0.951304667 | 0.944978212 | 0.945923243 | 0.950226244 | 0.951124093 | 0.942862625 | 0.944632178 | 0.947111303 | 0.946936525 | 0.939800609 | 0.941209229 | 0.943665161 |
| 41st | 0.952151852 | 0.946630912 | 0.946920104 | 0.949006864 | 0.950133419 | 0.942181663 | 0.944327036 | 0.947202677 | 0.947668351 | 0.940543642 | 0.941860402 | 0.944330818 |
| 42nd | 0.950440616 | 0.944495594 | 0.945679337 | 0.945537938 | 0.950565845 | 0.943586028 | 0.94453443  | 0.946220698 | 0.948188822 | 0.940348577 | 0.942167951 | 0.943908202 |
| 43rd | 0.951207323 | 0.944421064 | 0.94573623  | 0.948214449 | 0.948517791 | 0.941330998 | 0.942494981 | 0.945626681 | 0.94815762  | 0.940190276 | 0.942354246 | 0.944914881 |
| 44th | 0.950815374 | 0.947774107 | 0.946699177 | 0.948403172 | 0.94951823  | 0.943340056 | 0.944513802 | 0.947607555 | 0.947471614 | 0.940218786 | 0.941469462 | 0.943497358 |
| 45th | 0.953363512 | 0.946152227 | 0.9480998   | 0.947681657 | 0.94895087  | 0.941380928 | 0.943246759 | 0.946976229 | 0.947768001 | 0.939307542 | 0.941574224 | 0.943382593 |
| 46th | 0.952178589 | 0.945279505 | 0.945961544 | 0.945329604 | 0.950703699 | 0.943672041 | 0.944931124 | 0.947657691 | 0.948715288 | 0.939852006 | 0.942380471 | 0.943282925 |
| 47th | 0.94995405  | 0.94745963  | 0.945359065 | 0.948514671 | 0.949492256 | 0.941566753 | 0.943284123 | 0.945801189 | 0.947413581 | 0.939363301 | 0.941412761 | 0.944220105 |
| 48th | 0.951654078 | 0.94607469  | 0.944732479 | 0.947937221 | 0.949643204 | 0.942144617 | 0.943349938 | 0.94738138  | 0.947004482 | 0.938958128 | 0.940669072 | 0.943848386 |
| 49th | 0.951090097 | 0.946703441 | 0.946834778 | 0.9479268   | 0.950373663 | 0.943412117 | 0.944904639 | 0.944451264 | 0.947549159 | 0.940544413 | 0.941479472 | 0.943550413 |
| 50th | 0.95163999  | 0.947362897 | 0.946549462 | 0.948542805 | 0.950017034 | 0.942075118 | 0.944002044 | 0.946913109 | 0.947655832 | 0.93971283  | 0.941960438 | 0.9449498   |
| 51st | 0.953439542 | 0.947560431 | 0.946799297 | 0.947793359 | 0.948694994 | 0.942705502 | 0.943984397 | 0.94634699  | 0.948028134 | 0.939330578 | 0.942111169 | 0.94463318  |
| 52nd | 0.949437466 | 0.943326952 | 0.943195825 | 0.948607942 | 0.949479623 | 0.942277691 | 0.944307909 | 0.946773579 | 0.946295669 | 0.938907771 | 0.941197364 | 0.943624828 |
| 53rd | 0.951763594 | 0.947065925 | 0.947538316 | 0.948371217 | 0.953446281 | 0.946740646 | 0.948283536 | 0.948316019 | 0.948197878 | 0.939162688 | 0.941680961 | 0.942972973 |
| 54th | 0.951401673 | 0.945142797 | 0.945090201 | 0.947704664 | 0.949920653 | 0.943817831 | 0.944148001 | 0.947650875 | 0.946918996 | 0.939303216 | 0.941379254 | 0.944280805 |
| 55th | 0.950605263 | 0.945763158 | 0.946342105 | 0.947849675 | 0.951844437 | 0.943761714 | 0.945582723 | 0.945573035 | 0.947225257 | 0.939436312 | 0.941511907 | 0.94439133  |
| 56th | 0.951323722 | 0.945032765 | 0.946526868 | 0.948822958 | 0.949868973 | 0.942795662 | 0.943520037 | 0.946139903 | 0.948096206 | 0.94099657  | 0.942503877 | 0.943507154 |
| 57th | 0.952354716 | 0.945244654 | 0.94629411  | 0.947406844 | 0.951147605 | 0.943971035 | 0.946039956 | 0.945842727 | 0.947057216 | 0.939330018 | 0.941259085 | 0.944337571 |
| 58th | 0.950809775 | 0.945743759 | 0.945113788 | 0.950205074 | 0.950417631 | 0.943601122 | 0.94428384  | 0.947041955 | 0.948006118 | 0.939222113 | 0.941620234 | 0.943894389 |
| 59th | 0.952644704 | 0.946974669 | 0.94726342  | 0.946781011 | 0.949299917 | 0.941201543 | 0.943918761 | 0.946448585 | 0.94836122  | 0.940470596 | 0.941956919 | 0.944306744 |
| 60th | 0.952359657 | 0.947966539 | 0.945704214 | 0.949498633 | 0.950953942 | 0.943565904 | 0.944935597 | 0.946950972 | 0.948104065 | 0.93952663  | 0.941863449 | 0.943901504 |
| 61st | 0.954079756 | 0.948957075 | 0.950165502 | 0.949388916 | 0.949533747 | 0.941521029 | 0.943676248 | 0.946829184 | 0.947324959 | 0.939400734 | 0.941539017 | 0.944064816 |
| 62nd | 0.951727215 | 0.94450861  | 0.946109828 | 0.948597847 | 0.950577274 | 0.943733143 | 0.945385542 | 0.948318728 | 0.947559896 | 0.93938798  | 0.941917123 | 0.943770173 |
| 63rd | 0.949482478 | 0.943913203 | 0.944569957 | 0.947800694 | 0.94993921  | 0.947312459 | 0.944638782 | 0.944252923 | 0.947050759 | 0.938994216 | 0.941271896 | 0.944125615 |
| 64th | 0.951902124 | 0.946309958 | 0.946126178 | 0.94432199  | 0.95051856  | 0.944023255 | 0.944236216 | 0.946435154 | 0.947019289 | 0.939408499 | 0.941095539 | 0.944338572 |

|       |             |             |             |             |             |             |             |             |             |             |             |             |
|-------|-------------|-------------|-------------|-------------|-------------|-------------|-------------|-------------|-------------|-------------|-------------|-------------|
| 65th  | 0.952747628 | 0.948148537 | 0.947018475 | 0.944773895 | 0.950868809 | 0.943860735 | 0.944724744 | 0.948552223 | 0.947353473 | 0.939635915 | 0.94165679  | 0.944472707 |
| 66th  | 0.950857563 | 0.945420639 | 0.946681375 | 0.950177504 | 0.951332104 | 0.94408256  | 0.945703046 | 0.947293886 | 0.947943111 | 0.93930609  | 0.942008572 | 0.943187026 |
| 67th  | 0.95269631  | 0.947046147 | 0.947177547 | 0.94785621  | 0.950200923 | 0.942323886 | 0.945009966 | 0.946572593 | 0.947617514 | 0.940313662 | 0.941994967 | 0.944986729 |
| 68th  | 0.953191043 | 0.946995353 | 0.947572917 | 0.950221709 | 0.951826524 | 0.945781394 | 0.94621422  | 0.946485987 | 0.948104622 | 0.940222471 | 0.942430785 | 0.943514868 |
| 69th  | 0.951638721 | 0.946338135 | 0.946626781 | 0.946899967 | 0.950347281 | 0.944136697 | 0.944839782 | 0.946520309 | 0.948320102 | 0.940206479 | 0.942947494 | 0.943425894 |
| 70th  | 0.951721055 | 0.947198191 | 0.946724868 | 0.948078322 | 0.949374507 | 0.943758924 | 0.944813844 | 0.946979023 | 0.947088356 | 0.939306105 | 0.942046026 | 0.944725545 |
| 71st  | 0.951874606 | 0.946124764 | 0.946072254 | 0.949738665 | 0.950567952 | 0.943247448 | 0.944494171 | 0.947124144 | 0.946691498 | 0.938635966 | 0.940596601 | 0.943196066 |
| 72nd  | 0.951465225 | 0.946087048 | 0.946795393 | 0.947365222 | 0.949825992 | 0.943196618 | 0.945224929 | 0.945932973 | 0.948109237 | 0.939784194 | 0.939893518 | 0.944315823 |
| 73rd  | 0.950344356 | 0.946322486 | 0.945849324 | 0.94815423  | 0.949168256 | 0.941282409 | 0.943403063 | 0.947417678 | 0.9473141   | 0.939030051 | 0.941072394 | 0.94361656  |
| 74th  | 0.953987199 | 0.949532953 | 0.95052759  | 0.948835515 | 0.951157714 | 0.9444661   | 0.945492581 | 0.947449939 | 0.94750339  | 0.9398539   | 0.94194261  | 0.944530298 |
| 75th  | 0.952709981 | 0.947087723 | 0.946378373 | 0.947800194 | 0.949850244 | 0.942548951 | 0.944563468 | 0.948047308 | 0.948994771 | 0.94006913  | 0.942349763 | 0.943337504 |
| 76th  | 0.953702731 | 0.947951681 | 0.948398109 | 0.945271214 | 0.950354988 | 0.943436454 | 0.944566446 | 0.94828859  | 0.947693669 | 0.939852911 | 0.941890962 | 0.943273029 |
| 77th  | 0.95010903  | 0.945327483 | 0.946325828 | 0.947780441 | 0.951041324 | 0.945103267 | 0.947024912 | 0.94848     | 0.947958174 | 0.939655314 | 0.941677735 | 0.944456317 |
| 78th  | 0.952203372 | 0.946504543 | 0.946373234 | 0.94894302  | 0.948871571 | 0.938711981 | 0.940225792 | 0.947672987 | 0.948020573 | 0.939537706 | 0.9413906   | 0.944980689 |
| 79th  | 0.952725936 | 0.946531223 | 0.946767462 | 0.949421658 | 0.951561232 | 0.94411815  | 0.945485028 | 0.945268662 | 0.947520736 | 0.938707757 | 0.941001098 | 0.944248439 |
| 80th  | 0.951255965 | 0.94546122  | 0.945775867 | 0.949259529 | 0.950363687 | 0.94359122  | 0.944369787 | 0.947556923 | 0.94665509  | 0.938808163 | 0.94051734  | 0.944252931 |
| 81st  | 0.952486072 | 0.946730789 | 0.946862189 | 0.947589226 | 0.949445143 | 0.9416388   | 0.943747471 | 0.945581578 | 0.947124639 | 0.939238997 | 0.941240485 | 0.944878024 |
| 82nd  | 0.953293382 | 0.94732692  | 0.947668612 | 0.94962936  | 0.951844437 | 0.943761714 | 0.945582723 | 0.947960653 | 0.947507437 | 0.940195993 | 0.9421592   | 0.943514618 |
| 83rd  | 0.952600792 | 0.948010387 | 0.947774309 | 0.94575221  | 0.949461722 | 0.943512902 | 0.944185748 | 0.946644861 | 0.948255049 | 0.940061506 | 0.942809074 | 0.94467159  |
| 84th  | 0.952777632 | 0.946943817 | 0.947495664 | 0.949827304 | 0.951079997 | 0.943652352 | 0.945466576 | 0.947487713 | 0.947024459 | 0.93918432  | 0.941499236 | 0.944307032 |
| 85th  | 0.950069676 | 0.945547288 | 0.944653327 | 0.948184638 | 0.950361856 | 0.94363559  | 0.944295445 | 0.947294448 | 0.94775291  | 0.939742237 | 0.941732602 | 0.944645066 |
| 86th  | 0.950228743 | 0.944444444 | 0.946442657 | 0.948651689 | 0.95049668  | 0.944020636 | 0.944445969 | 0.948215759 | 0.94763986  | 0.94059222  | 0.942493444 | 0.944384771 |
| 87th  | 0.953251872 | 0.947523322 | 0.947129155 | 0.946669503 | 0.949322308 | 0.943078169 | 0.945177308 | 0.946675866 | 0.947758012 | 0.939595884 | 0.942077871 | 0.944099731 |
| 88th  | 0.951262447 | 0.947741783 | 0.943143901 | 0.946498054 | 0.950932339 | 0.943665424 | 0.94514651  | 0.94723943  | 0.948336783 | 0.939440443 | 0.942820943 | 0.944272212 |
| 89th  | 0.952970883 | 0.946921276 | 0.948867671 | 0.948911757 | 0.949331314 | 0.942399164 | 0.944105539 | 0.948070486 | 0.948164524 | 0.939774557 | 0.941510412 | 0.944306409 |
| 90th  | 0.952240613 | 0.946109518 | NA          | 0.947826087 | 0.950226003 | 0.943445908 | 0.944746493 | 0.947622796 | 0.946665719 | 0.939790576 | 0.938407896 | 0.94478277  |
| 91st  | 0.951350075 | 0.947125351 | 0.944763704 | 0.947763006 | 0.950468983 | 0.942858666 | 0.945043701 | 0.948081514 | 0.947202746 | 0.939562692 | 0.941016379 | 0.943465852 |
| 92nd  | 0.950118203 | 0.944575781 | 0.945022327 | 0.948377491 | 0.95071862  | 0.944181838 | 0.945661663 | 0.948925756 | 0.947459045 | 0.939675199 | 0.94238096  | 0.945028975 |
| 93rd  | 0.953680837 | 0.947848248 | 0.948399979 | 0.948998179 | 0.949999467 | 0.942026668 | 0.943561539 | 0.948515485 | 0.947182752 | 0.939870687 | 0.942109632 | 0.945107593 |
| 94th  | 0.953176291 | 0.948134142 | 0.947582657 | 0.947643343 | 0.950231173 | 0.942575251 | 0.943621667 | 0.946963174 | 0.947534946 | 0.939534858 | 0.941808107 | 0.943960149 |
| 95th  | 0.952702525 | 0.947578632 | 0.947867672 | 0.945648205 | 0.94888121  | 0.942418037 | 0.942801988 | 0.947877876 | 0.948113569 | 0.940023396 | 0.942483246 | 0.943862252 |
| 96th  | 0.952796468 | 0.945305929 | 0.941889193 | 0.946810771 | 0.949966957 | 0.942964037 | 0.944989234 | 0.946912896 | 0.948306781 | 0.940510426 | 0.942527856 | 0.944802462 |
| 97th  | 0.95082484  | 0.946385416 | 0.945334664 | 0.949186004 | 0.948828725 | 0.9431675   | 0.94624147  | 0.946822261 | 0.947130619 | 0.939246924 | 0.940896873 | 0.944458754 |
| 98th  | 0.950304366 | 0.943875945 | 0.944190806 | 0.948415108 | 0.94990157  | 0.941367385 | 0.94396382  | 0.945050888 | 0.947812643 | 0.939585473 | 0.941541201 | 0.94506207  |
| 99th  | 0.956105697 | 0.949653235 | 0.950399438 | 0.946885166 | 0.950948067 | 0.943094636 | 0.944791233 | 0.946735649 | 0.948003648 | 0.939593357 | 0.941362795 | 0.944147147 |
| 100th | 0.951373929 | 0.945436873 | 0.947013083 | 0.948373774 | 0.950495471 | 0.942802344 | 0.944453916 | 0.944786256 | 0.948364427 | 0.940697509 | 0.942473524 | 0.944585951 |
| 101st | 0.951854279 | 0.945616564 | 0.944987551 | 0.947846977 | 0.950167035 | 0.943325542 | 0.944350165 | 0.947026068 | 0.94772593  | 0.939724574 | 0.942267725 | 0.94455642  |
| 102nd | 0.951143315 | 0.946102754 | 0.946207766 | 0.949472211 | 0.952590015 | 0.945341838 | 0.947371328 | 0.946621147 | 0.947727285 | 0.939662196 | 0.941986035 | 0.943301562 |

|       |             |             |             |             |             |             |             |             |             |             |             |             |
|-------|-------------|-------------|-------------|-------------|-------------|-------------|-------------|-------------|-------------|-------------|-------------|-------------|
| 103rd | 0.951826544 | 0.944914586 | 0.945308804 | 0.947593615 | 0.951827384 | 0.945490374 | 0.947375883 | 0.946280127 | 0.947802813 | 0.939543903 | 0.941406527 | 0.944409131 |
| 104th | 0.950912822 | 0.94667754  | 0.946440785 | 0.947028935 | 0.951826524 | 0.945781394 | 0.94621422  | 0.946803926 | 0.947713347 | 0.939618372 | 0.941602488 | 0.944417176 |
| 105th | 0.951468039 | 0.947502495 | 0.947555019 | 0.948389447 | 0.953446281 | 0.946740646 | 0.948283536 | 0.947552534 | 0.948008125 | 0.940183681 | 0.941838116 | 0.944747664 |
| 106th | 0.952907861 | 0.948057056 | 0.947191777 | 0.947125038 | 0.952873916 | 0.94724692  | 0.94986203  | 0.947972748 | 0.947776347 | 0.939872934 | 0.941635919 | 0.944928247 |
| 107th | 0.949860724 | 0.944026909 | 0.945629894 | 0.947627438 | 0.95075927  | 0.948028769 | 0.945046542 | 0.9482502   | 0.947927731 | 0.939009034 | 0.942326855 | 0.944512683 |
| 108th | 0.953779528 | 0.946692913 | 0.947427822 | 0.948427291 | 0.954556418 | 0.948058397 | 0.949633245 | 0.947053464 | 0.948512167 | 0.940869356 | 0.942821061 | 0.943716768 |
| 109th | 0.951984887 | 0.945871487 | 0.945923963 | 0.952140291 | 0.94990249  | 0.948163587 | 0.945363422 | 0.946936664 | 0.947775491 | 0.940002947 | 0.94192425  | 0.944373152 |
| 110th | 0.950213782 | 0.945020067 | 0.945649608 | 0.948187159 | 0.94993921  | 0.947312459 | 0.944638782 | 0.947895495 | 0.946837088 | 0.940088669 | 0.941655656 | 0.944988943 |
| Mean  | 0.95180932  | 0.946218282 | 0.946355    | 0.9481544   | 0.950458319 | 0.943574845 | 0.944858969 | 0.947093095 | 0.947652395 | 0.939682438 | 0.9417369   | 0.944115396 |
| SD    | 0.001152187 | 0.001332409 | 0.0013914   | 0.001320839 | 0.001089469 | 0.001665114 | 0.001621139 | 0.000982618 | 0.000535459 | 0.000556305 | 0.0006603   | 0.000606357 |

Note: two simulation failed due to technical issue and their concordance frequency are written as NA in the above table.

**Table S5.** Frequency of the markers that showed Mendelian inconsistency in Trios.

| Population      | Trios1<br>Markers frequency<br>(No. of markers) | Trios2<br>Markers frequency<br>(No. of markers) | Trios3<br>Markers frequency<br>(No. of markers) | Trios4<br>Markers frequency<br>(No. of markers) | Trios5<br>Markers frequency<br>(No. of markers) |
|-----------------|-------------------------------------------------|-------------------------------------------------|-------------------------------------------------|-------------------------------------------------|-------------------------------------------------|
| Vysya           | 0.0007 (607)                                    | 0.00106 (928)                                   | 0.00138 (1205)                                  | 0.00092 (799)                                   | 0.00105 (915)                                   |
| Kashmiri Pandit | <b>0.10475 (91378)</b>                          | <b>0.17085 (149042)</b>                         | 0.00066 (573)                                   | 0.00082 (711)                                   | 0.00154 (1345)                                  |
| Mala            | 0.00074 (642)                                   | 0.00088 (764)                                   | 0.00112 (973)                                   | 0.00122 (1060)                                  | 0.0012 (1045)                                   |
| Madiga          | 0.00074 (647)                                   | 0.00079 (686)                                   | 0.001 (870)                                     | 0.00098 (851)                                   | 0.00088 (766)                                   |
| Kshatriya       | 0.00192 (1674)                                  | 0.00088 (766)                                   | 0.00078 (682)                                   | 0.00084 (729)                                   | 0.00073 (633)                                   |
| Brahmin         | 0.00074 (645)                                   | 0.05494 (47930)                                 | 0.00073 (637)                                   | 0.00074 (642)                                   | 0.00117 (1024)                                  |

Note: The Trios1 and Trios2 of Kashmiri Pandit showed high rate of Mendelian inconsistency (>10%) and were removed from further analysis.

**Table S6.** List of Indian population samples used from our earlier study<sup>1,2</sup> for comparative analysis.

| S. No | Population                | Linguistic group | No. of individuals |
|-------|---------------------------|------------------|--------------------|
| 1     | Bhumij                    | Austro-Asiatic   | 5                  |
| 2     | Birhor                    | Austro-Asiatic   | 5                  |
| 3     | Ho                        | Austro-Asiatic   | 5                  |
| 4     | Kharia                    | Austro-Asiatic   | 5                  |
| 5     | Korku                     | Austro-Asiatic   | 5                  |
| 6     | Munda                     | Austro-Asiatic   | 5                  |
| 7     | Santhal                   | Austro-Asiatic   | 5                  |
| 8     | Adi-Dravider              | Dravidian        | 5                  |
| 9     | Chenchu                   | Dravidian        | 7                  |
| 10    | Gond – Chattisgarh        | Dravidian        | 5                  |
| 11    | Gond – Madhya Pradesh     | Dravidian        | 5                  |
| 12    | Gond – Uttar Pradesh      | Dravidian        | 5                  |
| 13    | Gounder                   | Dravidian        | 5                  |
| 14    | Hallaki                   | Dravidian        | 3                  |
| 15    | Irula                     | Dravidian        | 5                  |
| 16    | Jews Kerala               | Dravidian        | 5                  |
| 17    | Kallar                    | Dravidian        | 5                  |
| 18    | Kamsali                   | Dravidian        | 5                  |
| 19    | Kattunayakan              | Dravidian        | 5                  |
| 20    | Kurchian                  | Dravidian        | 5                  |
| 21    | Kurumba                   | Dravidian        | 6                  |
| 22    | Madiga                    | Dravidian        | 13                 |
| 23    | Mala                      | Dravidian        | 12                 |
| 24    | Malai Kuravar             | Dravidian        | 5                  |
| 25    | Malli                     | Dravidian        | 5                  |
| 26    | Minicoy                   | Dravidian        | 5                  |
| 27    | Naidu                     | Dravidian        | 4                  |
| 28    | Narikkuravar              | Dravidian        | 5                  |
| 29    | Palliyar                  | Dravidian        | 5                  |
| 30    | Panias                    | Dravidian        | 5                  |
| 31    | Vaish                     | Dravidian        | 2                  |
| 32    | Velama                    | Dravidian        | 3                  |
| 33    | Vysya                     | Dravidian        | 15                 |
| 34    | Bhil – Gujrat             | Indo-European    | 11                 |
| 35    | Bhil – Madhya Pradesh     | Indo-European    | 5                  |
| 36    | Brahmin                   | Indo-European    | 10                 |
| 37    | Jain                      | Indo-European    | 5                  |
| 38    | Kashmiri Pandit           | Indo-European    | 15                 |
| 39    | Kshatriya – Rajasthan     | Indo-European    | 5                  |
| 40    | Kshatriya – Uttar Pradesh | Indo-European    | 10                 |
| 41    | Lodi                      | Indo-European    | 5                  |
| 42    | Meghawal                  | Indo-European    | 4                  |
| 43    | Sahariya                  | Indo-European    | 3                  |
| 44    | Satnami                   | Indo-European    | 2                  |
| 45    | Srivastava                | Indo-European    | 1                  |
| 46    | Tharu                     | Indo-European    | 4                  |
| 47    | Aonaga                    | Tibeto-Burman    | 4                  |
| 48    | Changkpa                  | Tibeto-Burman    | 5                  |
| 49    | Nyshi                     | Tibeto-Burman    | 3                  |
| 50    | Sherpa                    | Tibeto-Burman    | 5                  |
| 51    | Subba                     | Tibeto-Burman    | 5                  |
| 52    | Tibetan                   | Tibeto-Burman    | 5                  |
| 53    | Great Andamanese          | Andamanese       | 5                  |

Note: We used 150 Dravidians, 80 Indo-European, 35 Austro-Asiatic, 27 Tibeto-Burman and 5 Great Andamanese; and 15 trios of Dravidian (Vysya , Madiga, Mala; 5 each) and 15 trios of Indo-European (Kshatriya, Brahmin and Kashmiri Pandit; 5 each).

**Table S7.** Detection of outlier samples with sigma cutoff  $\pm 6$  in 10 iteration on eigenvector 1-10.

| S. No | Iteration number | Sample ID | Prakriti | Eigenvector | Sigma  |
|-------|------------------|-----------|----------|-------------|--------|
| 1     | 1                | P700      | Pitta    | 1           | 8.084  |
| 2     | 1                | P788      | Pitta    | 8           | -6.837 |
| 3     | 1                | P774      | Kapha    | 2           | 11.767 |
| 4     | 1                | B034      | Pitta    | 0           | 8.266  |
| 5     | 1                | B046      | Pitta    | 0           | 8.246  |
| 6     | 1                | B052      | Vata     | 0           | 8.377  |
| 7     | 1                | B276      | Kapha    | 9           | 6.476  |
| 8     | 1                | B275      | Kapha    | 9           | 6.476  |
| 9     | 1                | B100      | Pitta    | 4           | 6.977  |
| 10    | 1                | B077      | Vata     | 7           | 8.366  |
| 11    | 1                | B047      | Vata     | 7           | 8.366  |
| 12    | 1                | U150      | Kapha    | 9           | 6.119  |
| 13    | 1                | P721      | Kapha    | 3           | 8.274  |
| 14    | 1                | U015      | Kapha    | 9           | 6.064  |
| 15    | 1                | P618      | Kapha    | 5           | -8.584 |
| 16    | 1                | P654      | Kapha    | 5           | -8.582 |
| 17    | 1                | P700      | Pitta    | 1           | 8.144  |
| 18    | 1                | P788      | Pitta    | 8           | -6.729 |
| 19    | 2                | P1133     | Vata     | 8           | -9.111 |
| 20    | 2                | P1040     | Vata     | 0           | 6.628  |
| 21    | 2                | P706      | Pitta    | 1           | 9.471  |
| 22    | 2                | P668      | Kapha    | 4           | -9.38  |
| 23    | 2                | B282      | Pitta    | 7           | 7.962  |
| 24    | 2                | U076      | Vata     | 2           | 7.64   |
| 25    | 2                | P706      | Pitta    | 1           | 10.042 |
| 26    | 2                | B187      | Pitta    | 2           | 7.488  |
| 27    | 2                | B193      | Vata     | 3           | 6.71   |
| 28    | 2                | P1043     | Kapha    | 0           | 6.678  |
| 29    | 2                | P668      | Kapha    | 4           | -9.147 |
| 30    | 2                | B161      | Kapha    | 3           | 6.711  |
| 31    | 3                | B283      | Kapha    | 8           | 9.428  |
| 32    | 3                | B255      | Vata     | 6           | -6.941 |
| 33    | 3                | B103      | Vata     | 5           | -7.737 |
| 34    | 3                | B123      | Vata     | 9           | -7.94  |
| 35    | 3                | U012      | Kapha    | 3           | 6.922  |
| 36    | 3                | U113      | Kapha    | 4           | 7.026  |
| 37    | 3                | U120      | Vata     | 9           | 6.689  |
| 38    | 4                | B042      | Kapha    | 7           | -6.671 |
| 39    | 4                | B059      | Kapha    | 3           | 6.282  |
| 40    | 5                | B140      | Pitta    | 9           | 6.172  |

Note: After 5 iteration, no outlier samples were found.



**Table S8.** ANOVA statistics of *Prakriti* samples after outlier removal.

| <b>Eigenvector</b> | <b>Eigenvalue</b> | <b><i>Prakriti I vs. Prakriti II</i></b> | <b>ANOVA p-value</b> |
|--------------------|-------------------|------------------------------------------|----------------------|
| 1                  | 1.435535          | Vata vs. Kapha                           | 0.695176             |
|                    |                   | Vata vs. Pitta                           | 0.426118             |
|                    |                   | Kapha vs. Pitta                          | 0.2699               |
| 2                  | 1.299304          | Vata vs. Kapha                           | 0.0311195            |
|                    |                   | Vata vs. Pitta                           | 0.279802             |
|                    |                   | Kapha vs. Pitta                          | 0.471693             |
| 3                  | 1.236806          | Vata vs. Kapha                           | 0.440812             |
|                    |                   | Vata vs. Pitta                           | 0.956564             |
|                    |                   | Kapha vs. Pitta                          | 0.53893              |
| 4                  | 1.150733          | Vata vs. Kapha                           | 0.859844             |
|                    |                   | Vata vs. Pitta                           | 0.612884             |
|                    |                   | Kapha vs. Pitta                          | 0.416545             |
| 5                  | 1.12718           | Vata vs. Kapha                           | 0.38608              |
|                    |                   | Vata vs. Pitta                           | 0.599178             |
|                    |                   | Kapha vs. Pitta                          | 0.808545             |
| 6                  | 1.120482          | Vata vs. Kapha                           | 0.900018             |
|                    |                   | Vata vs. Pitta                           | 0.0536774            |
|                    |                   | Kapha vs. Pitta                          | 0.0457074            |
| 7                  | 1.112934          | Vata vs. Kapha                           | 0.513464             |
|                    |                   | Vata vs. Pitta                           | 0.437969             |
|                    |                   | Kapha vs. Pitta                          | 0.875392             |
| 8                  | 1.106404          | Vata vs. Kapha                           | 0.879887             |
|                    |                   | Vata vs. Pitta                           | 0.0819128            |
|                    |                   | Kapha vs. Pitta                          | 0.0624001            |
| 9                  | 1.102689          | Vata vs. Kapha                           | 0.213251             |
|                    |                   | Vata vs. Pitta                           | 0.153697             |
|                    |                   | Kapha vs. Pitta                          | 0.756238             |
| 10                 | 1.096925          | Vata vs. Kapha                           | 0.146971             |
|                    |                   | Vata vs. Pitta                           | 0.418338             |
|                    |                   | Kapha vs. Pitta                          | 0.580848             |

**Table S9.** Association analysis and population structure as confounding factor.

| SNP details |            |                   | Eigenstrat     |          |                  |            | EMMAX        |          | GCTA      |           |           |             |
|-------------|------------|-------------------|----------------|----------|------------------|------------|--------------|----------|-----------|-----------|-----------|-------------|
| Chr         | rsID       | Physical Position | Armitage chisq | P-value  | Eigenstrat chisq | P-value    | Beta Value   | P-value  | Freq      | Beta      | SE        | P-value     |
| 1           | rs213490   | 54627572          | 18.197         | 1.99E-05 | 18.324           | 1.86E-05   | -0.195586328 | 1.43E-05 | 0.421951  | 0.183966  | 0.0440512 | 2.96E-05    |
| 1           | rs619413   | 59394979          | 18.127         | 2.07E-05 | 20.193           | 7.00E-06   | 0.194252368  | 1.46E-05 | 0.419512  | -0.196835 | 0.0457044 | 1.66E-05    |
| 1           | rs2269241  | 63881359          | 18.52          | 1.68E-05 | 18.096           | 2.10E-05   | 0.241382171  | 1.20E-05 | 0.207317  | -0.231092 | 0.0561943 | 3.92E-05    |
| 1           | rs2269240  | 63881852          | 17.892         | 2.34E-05 | 17.435           | 2.97E-05   | 0.237576989  | 1.71E-05 | 0.204878  | -0.227571 | 0.056277  | 5.26E-05    |
| 1           | rs2269239  | 63881947          | 17.892         | 2.34E-05 | 17.435           | 2.97E-05   | 0.237576989  | 1.71E-05 | 0.204878  | -0.227571 | 0.056277  | 5.26E-05    |
| 1           | rs2269238  | 63890125          | 17.275         | 3.23E-05 | 17.106           | 3.54E-05   | 0.234035256  | 2.38E-05 | 0.202439  | -0.223742 | 0.0563748 | 7.22E-05    |
| 1           | rs6688707  | 100040996         | 17.901         | 2.33E-05 | 19.051           | 1.27E-05   | 0.193101915  | 1.70E-05 | 0.439024  | -0.196718 | 0.0438503 | 7.25E-06    |
| 1           | rs11166345 | 100045548         | 17.901         | 2.33E-05 | 19.051           | 1.27E-05   | 0.193101915  | 1.70E-05 | 0.439024  | -0.196718 | 0.0438503 | 7.25E-06    |
| 1           | rs6586471  | 104648021         | 20.733         | 5.28E-06 | 20.43            | 6.19E-06   | -0.229329208 | 3.37E-06 | 0.378049  | 0.221177  | 0.0485528 | 5.23E-06    |
| 2           | rs10197747 | 57644785          | 18.162         | 2.03E-05 | 17.377           | 3.06E-05   | -0.644329991 | 1.46E-05 | 0.0268293 | 0.620156  | 0.145749  | 2.09E-05    |
| 2           | rs13396046 | 57707740          | 18.162         | 2.03E-05 | 17.377           | 3.06E-05   | -0.644329991 | 1.46E-05 | 0.0268293 | 0.620156  | 0.145749  | 2.09E-05    |
| 2           | rs6748662  | 57710603          | 18.162         | 2.03E-05 | 17.377           | 3.06E-05   | -0.644329991 | 1.46E-05 | 0.0268293 | 0.620156  | 0.145749  | 2.09E-05    |
| 2           | rs1376616  | 79479938          | 17.969         | 2.25E-05 | 20.342           | 6.48E-06   | -0.498019348 | 1.63E-05 | 0.0463415 | 0.523608  | 0.113258  | 3.78E-06    |
| 2           | rs11902715 | 164190114         | 18.288         | 1.90E-05 | 18.474           | 1.72E-05   | -0.322637321 | 1.36E-05 | 0.121951  | 0.321006  | 0.0727299 | 1.02E-05    |
| 2           | rs1440472  | 164193843         | 17.755         | 2.51E-05 | 18.436           | 1.76E-05   | -0.280297715 | 1.84E-05 | 0.168293  | 0.2855    | 0.064126  | 8.50E-06    |
| 2           | rs6731290  | 164196489         | 17.44          | 2.97E-05 | 17.859           | 2.38E-05   | -0.339615215 | 2.20E-05 | 0.104878  | 0.335904  | 0.0783958 | 1.83E-05    |
| 2           | rs13429987 | 184201539         | 16.506         | 4.85E-05 | 13.318           | 0.0002629  | 0.215179401  | 3.74E-05 | 0.258537  | -0.204938 | 0.0508869 | 5.64E-05    |
| 2           | rs986846   | 239172751         | 17.476         | 2.91E-05 | 16.873           | 4.00E-05   | -0.225696305 | 3.91E-06 | 0.446341  | 0.225294  | 0.0480849 | 2.79E-06    |
| 2           | rs986846   | 239172751         | 20.474         | 6.05E-06 | 20.314           | 6.57E-06   | 0.198918743  | 2.16E-05 | 0.446341  | -0.19314  | 0.0457161 | 2.39E-05    |
| 3           | rs7616568  | 2045846           | 18.387         | 1.80E-05 | 14.967           | 0.00010941 | 0.198589056  | 1.29E-05 | 0.492683  | -0.184111 | 0.044496  | 3.51E-05    |
| 3           | rs9815240  | 147394867         | 20.044         | 7.57E-06 | 17.733           | 2.54E-05   | -0.401704714 | 5.00E-06 | 0.0707317 | 0.367374  | 0.0862046 | 2.03E-05    |
| 3           | rs9830734  | 186033195         | 20.263         | 6.75E-06 | 18.591           | 1.62E-05   | -0.227749903 | 4.41E-06 | 0.492683  | 0.21413   | 0.0487739 | 1.13E-05    |
| 3           | rs10446349 | 186131720         | 17.278         | 3.23E-05 | 17.169           | 3.42E-05   | -0.210703848 | 2.42E-05 | 0.478049  | 0.209463  | 0.0488663 | 1.82E-05    |
| 4           | rs2939743  | 37219957          | 19.263         | 1.14E-05 | 18.929           | 1.36E-05   | 0.187726761  | 7.81E-06 | 0.417073  | -0.182453 | 0.0410944 | 9.00E-06    |
| 5           | rs420150   | 141164192         | 19.833         | 8.45E-06 | 16.766           | 4.23E-05   | -0.28183339  | 5.80E-06 | 0.153659  | 0.250716  | 0.0635643 | 8.00E-05    |
| 5           | rs10866665 | 172908297         | 17.375         | 3.07E-05 | 16.842           | 4.06E-05   | 0.197103111  | 2.29E-05 | 0.456098  | -0.196801 | 0.0455844 | 1.58E-05    |
| 5           | rs7717957  | 172914029         | 17.375         | 3.07E-05 | 16.812           | 4.13E-05   | 0.197103111  | 2.29E-05 | 0.456098  | -0.195957 | 0.0455844 | 1.72E-05    |
| 6           | rs2655668  | 80248839          | 17.686         | 2.61E-05 | 13.699           | 0.00021456 | -0.199745656 | 1.99E-05 | 0.297561  | 0.173086  | 0.0476819 | 0.00028341  |
| 6           | rs767789   | 80290087          | 17.085         | 3.58E-05 | 13.48            | 0.00024116 | -0.183853673 | 2.81E-05 | 0.431707  | 0.159486  | 0.0446507 | 0.000354462 |
| 6           | rs790607   | 91163700          | 16.745         | 4.27E-05 | 15.457           | 8.44E-05   | 0.18619412   | 3.35E-05 | 0.463415  | -0.16762  | 0.0457178 | 0.000245978 |
| 6           | rs12526892 | 163641063         | 19.557         | 9.76E-06 | 18.448           | 1.75E-05   | 0.245880892  | 6.61E-06 | 0.268293  | -0.23655  | 0.0535982 | 1.02E-05    |

|    |            |           |        |          |        |            |              |          |           |           |           |             |
|----|------------|-----------|--------|----------|--------|------------|--------------|----------|-----------|-----------|-----------|-------------|
| 7  | rs10231685 | 103963525 | 19.156 | 1.20E-05 | 13.38  | 0.0002543  | -0.259623046 | 8.94E-06 | 0.173171  | 0.207816  | 0.0596195 | 0.000490825 |
| 7  | rs6969323  | 104001723 | 17.683 | 2.61E-05 | 12.427 | 0.00042326 | -0.23247942  | 2.02E-05 | 0.202439  | 0.195097  | 0.0555266 | 0.000442118 |
| 10 | rs17731    | 3811561   | 22.692 | 1.90E-06 | 22.576 | 2.02E-06   | -0.232364982 | 1.09E-06 | 0.321951  | 0.215453  | 0.0468657 | 4.28E-06    |
| 10 | rs2398215  | 10425666  | 20.524 | 5.89E-06 | 21.916 | 2.85E-06   | 0.224125475  | 3.92E-06 | 0.42439   | -0.231227 | 0.0496103 | 3.15E-06    |
| 10 | rs10994948 | 63270054  | 19.256 | 1.14E-05 | 17.281 | 3.22E-05   | -0.213094539 | 7.61E-06 | 0.343902  | 0.203748  | 0.0485908 | 2.75E-05    |
| 10 | rs2901714  | 95399009  | 17.577 | 2.76E-05 | 13.994 | 0.00018343 | -0.201746885 | 2.04E-05 | 0.482927  | 0.180935  | 0.0463887 | 9.60E-05    |
| 10 | rs6583901  | 95399988  | 17.76  | 2.51E-05 | 15.087 | 0.00010265 | -0.225907191 | 1.84E-05 | 0.226829  | 0.211845  | 0.0516756 | 4.14E-05    |
| 10 | rs1326217  | 95400989  | 17.589 | 2.74E-05 | 14.711 | 0.00012532 | -0.199767451 | 2.02E-05 | 0.487805  | 0.185931  | 0.0459181 | 5.14E-05    |
| 10 | rs12781996 | 108025031 | 17.357 | 3.10E-05 | 13.236 | 0.00027461 | 0.264593992  | 2.31E-05 | 0.197561  | -0.231126 | 0.0612235 | 0.000159932 |
| 11 | rs1439528  | 96115783  | 18.657 | 1.56E-05 | 16.834 | 4.08E-05   | -0.209702416 | 1.10E-05 | 0.492683  | 0.198192  | 0.0468016 | 2.29E-05    |
| 12 | rs3759173  | 113607258 | 17.964 | 2.25E-05 | 21.786 | 3.05E-06   | -0.37130311  | 1.64E-05 | 0.0780488 | 0.392915  | 0.0844523 | 3.28E-06    |
| 12 | rs10848194 | 129791290 | 18.445 | 1.75E-05 | 18.571 | 1.64E-05   | 0.197531472  | 1.25E-05 | 0.417073  | -0.195933 | 0.0441896 | 9.25E-06    |
| 14 | rs1862127  | 77477049  | 20.879 | 4.89E-06 | 19.79  | 8.65E-06   | -0.27020634  | 3.10E-06 | 0.209756  | 0.250679  | 0.0568152 | 1.02E-05    |
| 14 | rs4903671  | 77481783  | 21.023 | 4.54E-06 | 19.273 | 1.13E-05   | -0.273675684 | 2.86E-06 | 0.195122  | 0.252691  | 0.0573462 | 1.05E-05    |
| 14 | rs4020132  | 77481947  | 20.879 | 4.89E-06 | 19.79  | 8.65E-06   | -0.27020634  | 3.10E-06 | 0.209756  | 0.250679  | 0.0568152 | 1.02E-05    |
| 15 | rs1664454  | 55469925  | 21.34  | 3.85E-06 | 19.612 | 9.49E-06   | -0.225562079 | 2.38E-06 | 0.378049  | 0.212703  | 0.0470707 | 6.22E-06    |
| 15 | rs10518915 | 55472117  | 17.878 | 2.36E-05 | 16.023 | 6.26E-05   | -0.219953077 | 2.69E-06 | 0.463415  | 0.209321  | 0.0461332 | 5.70E-06    |
| 15 | rs10518915 | 55472117  | 21.125 | 4.30E-06 | 19.849 | 8.38E-06   | 0.188387771  | 1.78E-05 | 0.463415  | -0.173009 | 0.0447335 | 0.000109939 |
| 15 | rs2892383  | 91093506  | 18.218 | 1.97E-05 | 17.272 | 3.24E-05   | 0.183961194  | 1.43E-05 | 0.470732  | -0.176989 | 0.0431886 | 4.17E-05    |
| 15 | rs2388017  | 91094840  | 17.357 | 3.10E-05 | 16.498 | 4.87E-05   | 0.179381998  | 2.31E-05 | 0.458537  | -0.173149 | 0.0431282 | 5.95E-05    |
| 17 | rs4789092  | 70203226  | 20.53  | 5.87E-06 | 16.632 | 4.54E-05   | -0.367378973 | 3.86E-06 | 0.095122  | 0.311824  | 0.0815995 | 0.000132695 |
| 19 | rs8103262  | 57757626  | 17.614 | 2.71E-05 | 16.993 | 3.75E-05   | -0.24549101  | 2.00E-05 | 0.180488  | 0.240333  | 0.0561988 | 1.90E-05    |
| 20 | rs6039614  | 9815136   | 16.983 | 3.77E-05 | 15.853 | 6.85E-05   | 0.189897608  | 2.85E-05 | 0.495122  | -0.191366 | 0.0442719 | 1.54E-05    |

**Table S10.** The list of 52 markers and their frequency distribution among the three centres.

| Markers | Chr | rsID       | Allele-I | Allele-II | Allele-I frequency           |                         |                          | Chisq  | P-value |
|---------|-----|------------|----------|-----------|------------------------------|-------------------------|--------------------------|--------|---------|
|         |     |            |          |           | Bangalore (B) 40 individuals | Pune (P) 75 individuals | Udupi (U) 90 individuals |        |         |
| 1       | 1   | rs213490   | T        | C         | 0.4125                       | 0.38                    | 0.4611                   | 2.2433 | 0.3257  |
| 2       | 1   | rs619413   | T        | G         | 0.4125                       | 0.4133                  | 0.4278                   | 0.0902 | 0.9559  |
| 3       | 1   | rs2269241  | G        | A         | 0.2                          | 0.2733                  | 0.1556                   | 6.9386 | 0.03114 |
| 4       | 1   | rs2269240  | G        | A         | 0.2                          | 0.2733                  | 0.15                     | 7.6543 | 0.02177 |
| 5       | 1   | rs2269239  | C        | G         | 0.2                          | 0.2733                  | 0.15                     | 7.6543 | 0.02177 |
| 6       | 1   | rs6688707  | T        | G         | 0.4125                       | 0.44                    | 0.45                     | 0.3172 | 0.8534  |
| 7       | 1   | rs11166345 | A        | G         | 0.4125                       | 0.44                    | 0.45                     | 0.3172 | 0.8534  |
| 8       | 1   | rs6586471  | T        | C         | 0.4                          | 0.4267                  | 0.3278                   | 3.6065 | 0.1648  |
| 9       | 1   | rs2269238  | A        | C         | 0.1611                       | 0.26                    | 0.1875                   | 5.6753 | 0.05856 |
| 10      | 2   | rs10197747 | C        | A         | 0.025                        | 0.04                    | 0.01667                  | 1.7188 | 0.4234  |
| 11      | 2   | rs13396046 | A        | G         | 0.025                        | 0.04                    | 0.01667                  | 1.7188 | 0.4234  |
| 12      | 2   | rs6748662  | G        | A         | 0.025                        | 0.04                    | 0.01667                  | 1.7188 | 0.4234  |
| 13      | 2   | rs11902715 | G        | A         | 0.1125                       | 0.1533                  | 0.1                      | 2.2563 | 0.3236  |
| 14      | 2   | rs986846   | T        | C         | 0.425                        | 0.48                    | 0.4278                   | 1.0861 | 0.581   |
| 15      | 2   | rs1376616  | C        | T         | 0.03333                      | 0.06                    | 0.05                     | 2.1119 | 0.3479  |
| 16      | 2   | rs1440472  | T        | C         | 0.1667                       | 0.1867                  | 0.1375                   | 0.9071 | 0.6354  |
| 17      | 2   | rs6731290  | C        | T         | 0.07778                      | 0.14                    | 0.1                      | 3.3994 | 0.1827  |
| 18      | 2   | rs13429987 | G        | A         | 0.2444                       | 0.2533                  | 0.3                      | 1.1536 | 0.5617  |
| 19      | 3   | rs7616568  | G        | A         | 0.4875                       | 0.5                     | 0.4889                   | 0.0511 | 0.9748  |
| 20      | 3   | rs9815240  | C        | A         | 0.0375                       | 0.1133                  | 0.05                     | 6.6629 | 0.03574 |
| 21      | 3   | rs9830734  | T        | C         | 0.375                        | 0.5                     | 0.5389                   | 6.0024 | 0.04973 |
| 22      | 3   | rs10446349 | G        | A         | 0.5056                       | 0.4933                  | 0.3875                   | 3.2109 | 0.2008  |
| 23      | 4   | rs2939743  | A        | G         | 0.425                        | 0.4533                  | 0.3833                   | 1.6747 | 0.4329  |
| 24      | 5   | rs420150   | A        | C         | 0.2375                       | 0.1333                  | 0.1333                   | 5.3725 | 0.06814 |
| 25      | 5   | rs10866665 | G        | A         | 0.5375                       | 0.4333                  | 0.4389                   | 2.6651 | 0.2638  |
| 26      | 5   | rs7717957  | C        | G         | 0.55                         | 0.4267                  | 0.4389                   | 3.5822 | 0.1668  |
| 27      | 6   | rs2655668  | C        | T         | 0.3125                       | 0.2667                  | 0.3167                   | 1.0847 | 0.5814  |
| 28      | 6   | rs767789   | T        | C         | 0.425                        | 0.44                    | 0.4278                   | 0.068  | 0.9666  |
| 29      | 6   | rs12526892 | A        | G         | 0.3125                       | 0.2133                  | 0.2944                   | 3.7314 | 0.1548  |
| 30      | 6   | rs790607   | A        | G         | 0.4667                       | 0.4667                  | 0.45                     | 0.0719 | 0.9647  |
| 31      | 7   | rs10231685 | G        | A         | 0.2                          | 0.1733                  | 0.1611                   | 0.585  | 0.7464  |
| 32      | 7   | rs6969323  | A        | C         | 0.275                        | 0.18                    | 0.1889                   | 3.2813 | 0.1939  |
| 33      | 10  | rs17731    | A        | G         | 0.325                        | 0.3533                  | 0.2944                   | 1.304  | 0.521   |
| 34      | 10  | rs2398215  | A        | G         | 0.425                        | 0.44                    | 0.4111                   | 0.2797 | 0.8695  |
| 35      | 10  | rs10994948 | G        | A         | 0.3875                       | 0.32                    | 0.3444                   | 1.054  | 0.5904  |
| 36      | 10  | rs2901714  | A        | T         | 0.425                        | 0.4867                  | 0.5056                   | 1.4525 | 0.4837  |
| 37      | 10  | rs6583901  | T        | C         | 0.25                         | 0.22                    | 0.2222                   | 0.3066 | 0.8579  |
| 38      | 10  | rs1326217  | T        | A         | 0.4375                       | 0.4933                  | 0.5056                   | 1.0556 | 0.5899  |
| 39      | 10  | rs12781996 | A        | G         | 0.1944                       | 0.1867                  | 0.225                    | 0.5675 | 0.7529  |
| 40      | 11  | rs1439528  | A        | G         | 0.475                        | 0.5267                  | 0.4722                   | 1.0947 | 0.5785  |
| 41      | 12  | rs3759173  | A        | C         | 0.0625                       | 0.08667                 | 0.07778                  | 0.4238 | 0.8091  |
| 42      | 12  | rs10848194 | A        | C         | 0.325                        | 0.4133                  | 0.4611                   | 4.234  | 0.1204  |
| 43      | 14  | rs1862127  | T        | C         | 0.2                          | 0.22                    | 0.2056                   | 0.1601 | 0.9231  |
| 44      | 14  | rs4903671  | A        | C         | 0.2                          | 0.1933                  | 0.1944                   | 0.0157 | 0.9922  |
| 45      | 14  | rs4020132  | A        | G         | 0.2                          | 0.22                    | 0.2056                   | 0.1601 | 0.9231  |
| 46      | 15  | rs1664454  | T        | C         | 0.4125                       | 0.44                    | 0.3111                   | 6.2824 | 0.04323 |
| 47      | 15  | rs10518915 | C        | A         | 0.4375                       | 0.5133                  | 0.4333                   | 2.3743 | 0.3051  |
| 48      | 15  | rs2892383  | T        | C         | 0.4875                       | 0.44                    | 0.4889                   | 0.8971 | 0.6386  |
| 49      | 15  | rs2388017  | T        | C         | 0.4625                       | 0.4267                  | 0.4833                   | 1.0645 | 0.5873  |
| 50      | 17  | rs4789092  | C        | A         | 0.15                         | 0.04667                 | 0.1111                   | 7.4254 | 0.02441 |
| 51      | 19  | rs8103262  | C        | T         | 0.2375                       | 0.1333                  | 0.1944                   | 4.25   | 0.1194  |
| 52      | 20  | rs6039614  | C        | A         | 0.525                        | 0.5                     | 0.4778                   | 0.5166 | 0.7724  |

Note: Cut of bonferroni adjustment without correction p-value for first 52 marker is  $9.6 \times 10^{-4}$

**Table S11.** Prediction of *Prakrities* in 205 Ayurvedic samples with proposed statistical model.

| Sample ID | $W_{vs}$ | $W_{ps}$ | $W_{ks}$ | $V_{VP}$ | $V_{VK}$ | $V_{PK}$ | $V_{PV}$ | $V_{KP}$ | $V_{KV}$ | $R_V$ | $R_P$ | $R_K$ | Predicted <i>Prakriti</i> | True <i>Prakriti</i> |
|-----------|----------|----------|----------|----------|----------|----------|----------|----------|----------|-------|-------|-------|---------------------------|----------------------|
| B053      | -1.291   | -1.247   | 1.750    | -0.044   | -3.041   | -2.997   | 0.044    | 2.997    | 3.041    | 3.041 | 2.997 | 4.269 | K                         | K                    |
| B074      | -0.737   | 1.616    | -1.074   | -2.353   | 0.337    | 2.690    | 2.353    | -2.690   | -0.337   | 2.377 | 3.574 | 2.711 | P                         | P                    |
| B085      | -0.627   | 1.926    | -0.515   | -2.553   | -0.112   | 2.441    | 2.553    | -2.441   | 0.112    | 2.556 | 3.533 | 2.444 | P                         | P                    |
| B107      | 1.825    | -0.059   | -1.124   | 1.884    | 2.949    | 1.065    | -1.884   | -1.065   | -2.949   | 3.500 | 2.164 | 3.136 | V                         | V                    |
| B115      | -0.291   | 1.118    | -1.556   | -1.409   | 1.265    | 2.674    | 1.409    | -2.674   | -1.265   | 1.894 | 3.023 | 2.958 | P                         | P                    |
| B126      | 1.224    | -1.096   | -0.766   | 2.320    | 1.990    | -0.330   | -2.320   | 0.330    | -1.990   | 3.056 | 2.343 | 2.017 | V                         | V                    |
| B128      | -1.035   | 0.297    | 1.732    | -1.332   | -2.766   | -1.435   | 1.332    | 1.435    | 2.766    | 3.070 | 1.957 | 3.116 | K                         | K                    |
| B148      | -1.323   | 0.881    | -1.752   | -2.204   | 0.429    | 2.633    | 2.204    | -2.633   | -0.429   | 2.245 | 3.434 | 2.668 | P                         | P                    |
| B156      | -0.207   | 1.568    | -1.896   | -1.775   | 1.689    | 3.464    | 1.775    | -3.464   | -1.689   | 2.450 | 3.892 | 3.854 | P                         | P                    |
| B157      | 0.253    | -1.690   | 1.390    | 1.943    | -1.137   | -3.080   | -1.943   | 3.080    | 1.137    | 2.251 | 3.642 | 3.283 | K                         | K                    |
| B205      | -1.115   | 0.075    | 1.816    | -1.190   | -2.931   | -1.741   | 1.190    | 1.741    | 2.931    | 3.163 | 2.109 | 3.409 | K                         | K                    |
| B206      | -0.694   | -0.078   | 2.058    | -0.616   | -2.753   | -2.136   | 0.616    | 2.136    | 2.753    | 2.821 | 2.223 | 3.484 | K                         | K                    |
| B210      | -0.279   | -0.949   | 2.115    | 0.671    | -2.394   | -3.065   | -0.671   | 3.065    | 2.394    | 2.486 | 3.137 | 3.889 | K                         | K                    |
| B254      | 2.689    | -0.872   | 0.338    | 3.562    | 2.352    | -1.210   | -3.562   | 1.210    | -2.352   | 4.268 | 3.762 | 2.645 | V                         | V                    |
| B260      | -0.511   | 1.368    | 2.433    | -1.880   | -2.944   | -1.064   | 1.880    | 1.064    | 2.944    | 3.493 | 2.160 | 3.130 | K                         | K                    |
| B271      | -0.492   | -0.442   | 1.898    | -0.050   | -2.390   | -2.340   | 0.050    | 2.340    | 2.390    | 2.391 | 2.341 | 3.345 | K                         | K                    |
| B277      | -0.854   | 1.599    | -0.563   | -2.453   | -0.290   | 2.162    | 2.453    | -2.162   | 0.290    | 2.470 | 3.270 | 2.182 | P                         | P                    |
| B288      | -1.691   | -0.126   | 1.549    | -1.566   | -3.240   | -1.675   | 1.566    | 1.675    | 3.240    | 3.599 | 2.293 | 3.648 | K                         | K                    |
| P1049     | 1.772    | -1.840   | -0.494   | 3.612    | 2.267    | -1.346   | -3.612   | 1.346    | -2.267   | 4.265 | 3.855 | 2.636 | V                         | V                    |
| P1053     | -0.407   | -1.234   | 1.483    | 0.827    | -1.890   | -2.717   | -0.827   | 2.717    | 1.890    | 2.063 | 2.840 | 3.309 | K                         | K                    |
| P1055     | -1.095   | 0.068    | 1.635    | -1.163   | -2.730   | -1.567   | 1.163    | 1.567    | 2.730    | 2.967 | 1.951 | 3.147 | K                         | K                    |
| P1073     | 1.457    | -1.853   | -1.637   | 3.310    | 3.094    | -0.217   | -3.310   | 0.217    | -3.094   | 4.531 | 3.317 | 3.101 | V                         | V                    |
| P1111     | -1.159   | -1.100   | 1.767    | -0.060   | -2.926   | -2.867   | 0.060    | 2.867    | 2.926    | 2.927 | 2.867 | 4.096 | K                         | K                    |
| P1114     | 0.996    | -1.373   | -0.919   | 2.369    | 1.914    | -0.454   | -2.369   | 0.454    | -1.914   | 3.046 | 2.412 | 1.968 | V                         | V                    |
| P1164     | 2.111    | -0.761   | -0.532   | 2.872    | 2.643    | -0.229   | -2.872   | 0.229    | -2.643   | 3.904 | 2.881 | 2.653 | V                         | V                    |
| P1183     | -1.061   | -0.899   | 1.272    | -0.163   | -2.333   | -2.170   | 0.163    | 2.170    | 2.333    | 2.339 | 2.177 | 3.186 | K                         | K                    |
| P1234     | -1.088   | 1.255    | -1.386   | -2.343   | 0.298    | 2.641    | 2.343    | -2.641   | -0.298   | 2.362 | 3.530 | 2.657 | P                         | P                    |
| P766      | -0.667   | 2.005    | -0.144   | -2.672   | -0.523   | 2.150    | 2.672    | -2.150   | 0.523    | 2.723 | 3.430 | 2.212 | P                         | P                    |
| P1048     | 2.520    | -0.283   | -1.377   | 2.802    | 3.897    | 1.094    | -2.802   | -1.094   | -3.897   | 4.800 | 3.009 | 4.048 | V                         | V                    |
| P1101     | 2.383    | -0.113   | -0.411   | 2.496    | 2.794    | 0.298    | -2.496   | -0.298   | -2.794   | 3.746 | 2.513 | 2.810 | V                         | V                    |
| P1107     | 2.031    | -1.198   | -2.114   | 3.229    | 4.146    | 0.916    | -3.229   | -0.916   | -4.146   | 5.255 | 3.357 | 4.246 | V                         | V                    |
| P055      | 1.860    | -0.187   | -0.780   | 2.046    | 2.640    | 0.594    | -2.046   | -0.594   | -2.640   | 3.340 | 2.131 | 2.706 | V                         | V                    |
| P542      | -1.557   | -1.207   | 2.447    | -0.351   | -4.004   | -3.654   | 0.351    | 3.654    | 4.004    | 4.020 | 3.670 | 5.421 | K                         | K                    |
| P606      | 1.884    | -0.838   | -0.460   | 2.721    | 2.343    | -0.378   | -2.721   | 0.378    | -2.343   | 3.591 | 2.748 | 2.374 | V                         | V                    |
| P835      | 0.113    | 1.320    | -1.480   | -1.206   | 1.594    | 2.800    | 1.206    | -2.800   | -1.594   | 1.999 | 3.049 | 3.222 | P                         | P                    |
| P848      | -0.127   | -0.829   | 1.816    | 0.702    | -1.943   | -2.645   | -0.702   | 2.645    | 1.943    | 2.066 | 2.737 | 3.282 | K                         | K                    |
| U020      | -0.919   | -1.370   | 1.952    | 0.451    | -2.871   | -3.322   | -0.451   | 3.322    | 2.871    | 2.906 | 3.353 | 4.391 | K                         | K                    |
| U040      | -1.037   | -1.395   | 1.906    | 0.358    | -2.944   | -3.301   | -0.358   | 3.301    | 2.944    | 2.965 | 3.320 | 4.423 | K                         | K                    |
| U049      | 0.676    | -1.711   | -1.419   | 2.387    | 2.095    | -0.292   | -2.387   | 0.292    | -2.095   | 3.176 | 2.404 | 2.115 | V                         | V                    |
| U071      | 3.013    | -0.868   | 0.288    | 3.881    | 2.724    | -1.156   | -3.881   | 1.156    | -2.724   | 4.742 | 4.049 | 2.960 | V                         | V                    |
| U078      | -0.989   | 0.293    | 2.408    | -1.282   | -3.397   | -2.115   | 1.282    | 2.115    | 3.397    | 3.631 | 2.474 | 4.002 | K                         | K                    |
| U104      | -0.639   | -1.352   | 2.201    | 0.713    | -2.841   | -3.554   | -0.713   | 3.554    | 2.841    | 2.929 | 3.624 | 4.549 | K                         | K                    |
| U146      | 2.720    | -1.345   | -0.327   | 4.066    | 3.047    | -1.019   | -4.066   | 1.019    | -3.047   | 5.081 | 4.191 | 3.213 | V                         | V                    |
| U165      | 1.523    | -1.564   | -0.988   | 3.087    | 2.511    | -0.576   | -3.087   | 0.576    | -2.511   | 3.980 | 3.141 | 2.577 | V                         | V                    |
| U168      | -0.975   | -1.668   | 0.923    | 0.693    | -1.897   | -2.591   | -0.693   | 2.591    | 1.897    | 2.020 | 2.682 | 3.211 | K                         | K                    |
| U181      | -0.499   | 1.609    | -0.833   | -2.108   | 0.335    | 2.442    | 2.108    | -2.442   | -0.335   | 2.134 | 3.226 | 2.465 | P                         | P                    |
| U194      | -0.446   | 2.171    | -1.046   | -2.617   | 0.600    | 3.217    | 2.617    | -3.217   | -0.600   | 2.685 | 4.147 | 3.272 | P                         | P                    |
| U226      | -2.145   | 2.074    | -1.413   | -4.219   | -0.732   | 3.487    | 4.219    | -3.487   | 0.732    | 4.282 | 5.473 | 3.563 | P                         | P                    |
| U315      | -0.785   | 1.909    | -1.429   | -2.694   | 0.644    | 3.338    | 2.694    | -3.338   | -0.644   | 2.770 | 4.290 | 3.400 | P                         | P                    |

**Table S12.** The prediction of *Prakrities* in Indian population samples with proposed statistical model.

| Sample-ID         | Ancestry       | $W_{vs}$ | $W_{ps}$ | $W_{ks}$ | $V_{KP}$ | $V_{KV}$ | $V_{PK}$ | $V_{PV}$ | $V_{VP}$ | $V_{VK}$ | $R_K$ | $R_P$ | $R_V$ | Predicted <i>Prakriti</i> |
|-------------------|----------------|----------|----------|----------|----------|----------|----------|----------|----------|----------|-------|-------|-------|---------------------------|
| Bhil_MP02         | Austro-Asiatic | -2.398   | 2.076    | -1.591   | -3.667   | 0.807    | 3.667    | 4.474    | -4.474   | -0.807   | 3.755 | 5.784 | 4.546 | P                         |
| Bhil_MP03         | Austro-Asiatic | 0.262    | 1.383    | -1.592   | -2.976   | -1.855   | 2.976    | 1.121    | -1.121   | 1.855    | 3.506 | 3.180 | 2.167 | P                         |
| Bhil97            | Indo-European  | -1.424   | 1.223    | -0.799   | -2.022   | 0.625    | 2.022    | 2.646    | -2.646   | -0.625   | 2.116 | 3.330 | 2.719 | P                         |
| Bhumihar04        | Austro-Asiatic | -0.990   | -2.914   | 0.456    | 3.370    | 1.446    | -3.370   | -1.924   | 1.924    | -1.446   | 3.667 | 3.880 | 2.407 | K                         |
| Bhumihar05        | Austro-Asiatic | -0.658   | 1.054    | -1.462   | -2.516   | -0.804   | 2.516    | 1.712    | -1.712   | 0.804    | 2.641 | 3.043 | 1.891 | P                         |
| Brahmin1F         | Indo-European  | -1.770   | -0.037   | 1.178    | 1.215    | 2.948    | -1.215   | 1.733    | -1.733   | -2.948   | 3.189 | 2.117 | 3.420 | K                         |
| Brahmin3F         | Indo-European  | -2.338   | 0.938    | 2.152    | 1.214    | 4.490    | -1.214   | 3.276    | -3.276   | -4.490   | 4.651 | 3.494 | 5.558 | K                         |
| Changpa05         | Tibeto-Burman  | -0.403   | 0.765    | -2.702   | -3.467   | -2.299   | 3.467    | 1.168    | -1.168   | 2.299    | 4.160 | 3.659 | 2.579 | P                         |
| Chenchu31         | Dravidian      | -2.316   | 0.504    | -1.138   | -1.642   | 1.178    | 1.642    | 2.820    | -2.820   | -1.178   | 2.021 | 3.263 | 3.056 | P                         |
| Chenchu37         | Dravidian      | 0.074    | 1.640    | -1.289   | -2.929   | -1.364   | 2.929    | 1.565    | -1.565   | 1.364    | 3.231 | 3.321 | 2.076 | P                         |
| Gond_MP05         | Dravidian      | -1.063   | -2.019   | 1.542    | 3.560    | 2.604    | -3.560   | -0.956   | 0.956    | -2.604   | 4.411 | 3.686 | 2.774 | K                         |
| Jews04            | Dravidian      | -2.475   | -1.846   | 2.592    | 4.438    | 5.067    | -4.438   | 0.629    | -0.629   | -5.067   | 6.736 | 4.483 | 5.106 | K                         |
| Kall01            | Dravidian      | 0.219    | 2.346    | -0.423   | -2.769   | -0.642   | 2.769    | 2.127    | -2.127   | 0.642    | 2.842 | 3.492 | 2.222 | P                         |
| Kashmiri_pandit2F | Indo-European  | -0.737   | 1.490    | -2.274   | -3.764   | -1.537   | 3.764    | 2.227    | -2.227   | 1.537    | 4.065 | 4.373 | 2.706 | P                         |
| Kashmiri_pandit2M | Indo-European  | 0.961    | -1.175   | -1.973   | -0.798   | -2.934   | 0.798    | -2.136   | 2.136    | 2.934    | 3.040 | 2.280 | 3.629 | V                         |
| Kshatriya_Rj5F    | Indo-European  | -0.928   | 1.505    | -1.028   | -2.533   | -0.100   | 2.533    | 2.433    | -2.433   | 0.100    | 2.535 | 3.512 | 2.435 | P                         |
| Kshatriya_UP5F    | Indo-European  | -0.975   | 2.101    | -0.482   | -2.584   | 0.493    | 2.584    | 3.077    | -3.077   | -0.493   | 2.630 | 4.018 | 3.116 | P                         |
| Kshatriya_UP5M    | Indo-European  | 1.406    | -1.608   | -0.636   | 0.972    | -2.041   | -0.972   | -3.014   | 3.014    | 2.041    | 2.261 | 3.167 | 3.640 | V                         |
| Kurumba46         | Dravidian      | -0.405   | -1.990   | 1.596    | 3.585    | 2.001    | -3.585   | -1.584   | 1.584    | -2.001   | 4.106 | 3.920 | 2.552 | K                         |
| Lodi05            | Dravidian      | -0.284   | -0.063   | 2.106    | 2.169    | 2.391    | -2.169   | 0.222    | -0.222   | -2.391   | 3.228 | 2.180 | 2.401 | K                         |
| Madiga3F          | Dravidian      | -1.489   | 0.904    | -1.808   | -2.712   | -0.319   | 2.712    | 2.393    | -2.393   | 0.319    | 2.731 | 3.617 | 2.414 | P                         |
| Madiga4F          | Dravidian      | -1.193   | 1.838    | -0.390   | -2.228   | 0.803    | 2.228    | 3.032    | -3.032   | -0.803   | 2.369 | 3.762 | 3.136 | P                         |
| Mala5M            | Dravidian      | -0.898   | -1.644   | 0.950    | 2.594    | 1.849    | -2.594   | -0.745   | 0.745    | -1.849   | 3.186 | 2.699 | 1.993 | K                         |
| Minicoy01         | Dravidian      | -1.459   | -1.053   | 2.046    | 3.098    | 3.504    | -3.098   | 0.406    | -0.406   | -3.504   | 4.678 | 3.125 | 3.528 | K                         |
| Munda01           | Dravidian      | 1.209    | -1.771   | -0.524   | 1.246    | -1.734   | -1.246   | -2.980   | 2.980    | 1.734    | 2.135 | 3.230 | 3.447 | V                         |
| Munda02           | Dravidian      | -1.766   | 1.164    | -1.655   | -2.819   | 0.111    | 2.819    | 2.929    | -2.929   | -0.111   | 2.821 | 4.065 | 2.931 | P                         |
| Naidu77           | Dravidian      | 0.004    | -1.482   | -2.983   | -1.501   | -2.987   | 1.501    | -1.486   | 1.486    | 2.987    | 3.343 | 2.112 | 3.337 | V                         |
| Naidu80           | Dravidian      | -0.542   | 1.835    | -1.130   | -2.965   | -0.588   | 2.965    | 2.377    | -2.377   | 0.588    | 3.023 | 3.800 | 2.449 | P                         |
| Narikuravar04     | Dravidian      | 2.781    | 0.758    | -0.514   | -1.272   | -3.295   | 1.272    | -2.023   | 2.023    | 3.295    | 3.532 | 2.389 | 3.866 | V                         |
| Paliyar04         | Dravidian      | -1.151   | 1.282    | -0.873   | -2.155   | 0.278    | 2.155    | 2.434    | -2.434   | -0.278   | 2.173 | 3.251 | 2.449 | P                         |
| Paniyan01         | Dravidian      | -1.032   | -1.349   | 1.168    | 2.517    | 2.199    | -2.517   | -0.317   | 0.317    | -2.199   | 3.342 | 2.537 | 2.222 | K                         |
| Paniyan02         | Dravidian      | -0.492   | 1.977    | -1.131   | -3.108   | -0.639   | 3.108    | 2.469    | -2.469   | 0.639    | 3.173 | 3.970 | 2.550 | P                         |
| Santhal77         | Austro-Asiatic | 0.083    | -1.098   | -2.719   | -1.621   | -2.802   | 1.621    | -1.181   | 1.181    | 2.802    | 3.237 | 2.006 | 3.041 | V                         |
| Subba01           | Tibeto-Burman  | -1.583   | 0.749    | 1.823    | 1.074    | 3.406    | -1.074   | 2.332    | -2.332   | -3.406   | 3.571 | 2.567 | 4.127 | K                         |
| Velama83          | Dravidian      | 2.365    | -1.175   | 0.114    | 1.290    | -2.251   | -1.290   | -3.541   | 3.541    | 2.251    | 2.594 | 3.768 | 4.196 | V                         |
| Vysya2F           | Dravidian      | -0.498   | 2.076    | 0.391    | -1.685   | 0.889    | 1.685    | 2.574    | -2.574   | -0.889   | 1.905 | 3.077 | 2.723 | P                         |
| Vysya53           | Dravidian      | -1.824   | 1.371    | 0.361    | -1.011   | 2.185    | 1.011    | 3.195    | -3.195   | -2.185   | 2.407 | 3.351 | 3.871 | P                         |







**Table S14.** The combined association result of Affymetrix and Ion-torrent data.

| Platform           | Chr      | rsID               | Physical position | Mutant allele | Frequency of mutant allele in Pitita | Frequency of mutant allele in Kapha | Wild type allele | Chisq value   | P-value          | OR            |
|--------------------|----------|--------------------|-------------------|---------------|--------------------------------------|-------------------------------------|------------------|---------------|------------------|---------------|
| Affymetrix         | 1        | rs170091           | 64053568          | T             | 0.35                                 | 0.3724                              | G                | 0.1838        | 0.6681           | 0.9074        |
| Ion-torrent        | 1        | rs217490           | 64059644          | C             | 0.2907                               | 0.2571                              | G                | 0.2176        | 0.6409           | 1.184         |
| Ion-torrent        | 1        | rs61003960         | 64059863          | A             | 0.1047                               | 0.1429                              | T                | 0.5266        | 0.468            | 0.7013        |
| Affymetrix         | 1        | rs865929           | 64064378          | T             | 0.5                                  | 0.4586                              | C                | 0.5833        | 0.445            | 1.18          |
| Affymetrix         | 1        | rs855325           | 64064780          | A             | 0.125                                | 0.1621                              | G                | 0.9087        | 0.3405           | 0.7386        |
| Affymetrix         | 1        | rs855319           | 64068336          | A             | 0.5                                  | 0.4552                              | G                | 0.685         | 0.4079           | 1.197         |
| Affymetrix         | 1        | rs855318           | 64068386          | G             | 0.5                                  | 0.4552                              | A                | 0.685         | 0.4079           | 1.197         |
| Affymetrix         | 1        | rs855317           | 64069337          | C             | 0.5083                               | 0.4621                              | T                | 0.7284        | 0.3934           | 1.204         |
| Affymetrix         | 1        | rs855316           | 64069495          | G             | 0.1333                               | 0.1724                              | A                | 0.9598        | 0.3272           | 0.7385        |
| Affymetrix         | 1        | rs855315           | 64069612          | G             | 0.525                                | 0.4621                              | A                | 1.347         | 0.2459           | 1.287         |
| Affymetrix         | 1        | rs10889433         | 64074437          | T             | 0.2167                               | 0.1966                              | C                | 0.2127        | 0.6447           | 1.131         |
| Affymetrix         | 1        | rs7528129          | 64076814          | C             | 0.1417                               | 0.1828                              | T                | 1.012         | 0.3144           | 0.738         |
| Affymetrix         | 1        | rs855300           | 64078224          | A             | 0.1417                               | 0.169                               | G                | 0.4683        | 0.4938           | 0.8118        |
| Affymetrix         | 1        | rs11208252         | 64084491          | A             | 0.1333                               | 0.1966                              | G                | 2.318         | 0.1279           | 0.6289        |
| Affymetrix         | 1        | rs3790861          | 64087444          | C             | 0.15                                 | 0.1552                              | T                | 0.01746       | 0.8949           | 0.9608        |
| Ion-torrent        | 1        | Novel              | 64089405          | G             | 0                                    | 0.01429                             | A                | 1.236         | 0.2661           | 0             |
| Ion-torrent        | 1        | rs855314           | 64095111          | G             | 0.05814                              | 0.1143                              | A                | 1.593         | 0.207            | 0.4784        |
| Ion-torrent        | 1        | rs1126728          | 64097432          | T             | 0.3023                               | 0.4429                              | C                | 3.287         | 0.06984          | 0.5452        |
| Affymetrix         | 1        | rs2269252          | 64098065          | G             | 0.275                                | 0.3621                              | A                | 2.882         | 0.08959          | 0.6683        |
| Affymetrix         | 1        | rs2269251          | 64098188          | A             | 0.125                                | 0.05862                             | G                | 5.197         | 0.02262          | 2.294         |
| Ion-torrent        | 1        | rs6588052          | 64100478          | A             | 0.5233                               | 0.4571                              | T                | 0.6748        | 0.4114           | 1.303         |
| Ion-torrent        | 1        | Novel              | 64100693          | T             | 0.03488                              | 0.2                                 | G                | 10.84         | 0.0009959        | 0.1446        |
| Ion-torrent        | 1        | COSM133943         | 64102058          | T             | 0.01163                              | 0                                   | C                | 0.8192        | 0.3654           | NA            |
| Affymetrix         | 1        | rs2269248          | 64102114          | C             | 0.3833                               | 0.3862                              | T                | 0.002959      | 0.9566           | 0.9879        |
| Ion-torrent        | 1        | rs11577919         | 64104302          | G             | 0                                    | 0.01429                             | A                | 1.236         | 0.2661           | 0             |
| Ion-torrent        | 1        | rs11581836         | 64104307          | T             | 0.05814                              | 0.07143                             | C                | 0.1136        | 0.7361           | 0.8025        |
| Affymetrix         | 1        | rs2284997          | 64105775          | C             | 0.3833                               | 0.3345                              | T                | 0.8918        | 0.345            | 1.237         |
| <b>Affymetrix</b>  | <b>1</b> | <b>rs2269241</b>   | <b>64108771</b>   | <b>G</b>      | <b>0.075</b>                         | <b>0.2621</b>                       | <b>A</b>         | <b>18.07</b>  | <b>2.12E-005</b> | <b>0.2283</b> |
| <b>Affymetrix</b>  | <b>1</b> | <b>rs2269240</b>   | <b>64109264</b>   | <b>G</b>      | <b>0.075</b>                         | <b>0.2586</b>                       | <b>A</b>         | <b>17.57</b>  | <b>2.77E-005</b> | <b>0.2324</b> |
| <b>Affymetrix</b>  | <b>1</b> | <b>rs2269239</b>   | <b>64109359</b>   | <b>C</b>      | <b>0.075</b>                         | <b>0.2586</b>                       | <b>G</b>         | <b>17.57</b>  | <b>2.77E-005</b> | <b>0.2324</b> |
| <b>Affymetrix</b>  | <b>1</b> | <b>rs3790857</b>   | <b>64111866</b>   | <b>A</b>      | <b>0.1667</b>                        | <b>0.3138</b>                       | <b>G</b>         | <b>9.306</b>  | <b>0.002284</b>  | <b>0.4374</b> |
| <b>Affymetrix</b>  | <b>1</b> | <b>rs2024837</b>   | <b>64112250</b>   | <b>C</b>      | <b>0.425</b>                         | <b>0.2931</b>                       | <b>G</b>         | <b>6.661</b>  | <b>0.009854</b>  | <b>1.783</b>  |
| <b>Ion-torrent</b> | <b>1</b> | <b>rs11208257</b>  | <b>64114301</b>   | <b>C</b>      | <b>0.05814</b>                       | <b>0.2</b>                          | <b>T</b>         | <b>7.261</b>  | <b>0.007049</b>  | <b>0.2469</b> |
| <b>Ion-torrent</b> | <b>1</b> | <b>Novel</b>       | <b>64114303</b>   | <b>C</b>      | <b>0.01163</b>                       | <b>0</b>                            | <b>T</b>         | <b>0.8192</b> | <b>0.3654</b>    | <b>NA</b>     |
| <b>Ion-torrent</b> | <b>1</b> | <b>Novel</b>       | <b>64117205</b>   | <b>A</b>      | <b>0.03488</b>                       | <b>0</b>                            | <b>T</b>         | <b>2.49</b>   | <b>0.1146</b>    | <b>NA</b>     |
| <b>Ion-torrent</b> | <b>1</b> | <b>rs77434440</b>  | <b>64117319</b>   | <b>T</b>      | <b>0</b>                             | <b>0.01429</b>                      | <b>C</b>         | <b>1.236</b>  | <b>0.2661</b>    | <b>0</b>      |
| <b>Ion-torrent</b> | <b>1</b> | <b>rs147763516</b> | <b>64117414</b>   | <b>A</b>      | <b>0</b>                             | <b>0.01429</b>                      | <b>G</b>         | <b>1.236</b>  | <b>0.2661</b>    | <b>0</b>      |
| <b>Ion-torrent</b> | <b>1</b> | <b>rs2269238</b>   | <b>64117537</b>   | <b>T</b>      | <b>0.05814</b>                       | <b>0.2</b>                          | <b>G</b>         | <b>7.261</b>  | <b>0.007049</b>  | <b>0.2469</b> |
| <b>Affymetrix</b>  | <b>1</b> | <b>rs2269238</b>   | <b>64117537</b>   | <b>A</b>      | <b>0.075</b>                         | <b>0.2552</b>                       | <b>C</b>         | <b>17.07</b>  | <b>3.61E-005</b> | <b>0.2367</b> |
| Affymetrix         | 1        | rs2269237          | 64117913          | C             | 0.2417                               | 0.1379                              | T                | 6.526         | 0.01063          | 1.992         |
| Ion-torrent        | 1        | rs199629577        | 64120149          | T             | 0                                    | 0.01429                             | C                | 1.236         | 0.2661           | 0             |
| Affymetrix         | 1        | rs2749100          | 64124979          | A             | 0.1583                               | 0.2621                              | C                | 5.131         | 0.0235           | 0.5297        |
| Affymetrix         | 1        | rs11208264         | 64125072          | G             | 0.1667                               | 0.2621                              | A                | 4.308         | 0.03793          | 0.5632        |
| Ion-torrent        | 1        | rs11208265         | 64125234          | T             | 0.1628                               | 0.2143                              | G                | 0.6762        | 0.4109           | 0.713         |
| Affymetrix         | 1        | rs11208265         | 64125234          | T             | 0.1667                               | 0.2621                              | G                | 4.308         | 0.03793          | 0.5632        |
| Ion-torrent        | 1        | rs8294             | 64125368          | T             | 0.05814                              | 0.1857                              | C                | 6.153         | 0.01312          | 0.2707        |
| Ion-torrent        | 1        | rs4643             | 64125439          | C             | 0.05814                              | 0.1857                              | A                | 6.153         | 0.01312          | 0.2707        |
| Affymetrix         | 1        | rs4643             | 64125439          | C             | 0.08333                              | 0.2276                              | A                | 11.7          | 0.0006262        | 0.3085        |
| Affymetrix         | 1        | rs2749098          | 64125476          | T             | 0                                    | 0                                   | C                | NA            | NA               | NA            |
| Ion-torrent        | 1        | rs10909            | 64125544          | T             | 0.186                                | 0.07143                             | C                | 4.352         | 0.03697          | 2.971         |
| Affymetrix         | 1        | rs10909            | 64125544          | A             | 0.1583                               | 0.1034                              | G                | 2.43          | 0.119            | 1.63          |
| Ion-torrent        | 1        | rs80334201         | 64125793          | A             | 0.01163                              | 0                                   | G                | 0.8192        | 0.3654           | NA            |
| Ion-torrent        | 1        | Novel              | 64125944          | G             | 0.01163                              | 0                                   | C                | 0.8192        | 0.3654           | NA            |
| Affymetrix         | 1        | rs855351           | 64126450          | T             | 0.15                                 | 0.09655                             | C                | 2.434         | 0.1187           | 1.651         |
| Affymetrix         | 1        | rs855350           | 64127004          | A             | 0.225                                | 0.3241                              | G                | 4.01          | 0.04523          | 0.6054        |
| Affymetrix         | 1        | rs855349           | 64127189          | C             | 0.225                                | 0.3207                              | A                | 3.754         | 0.05268          | 0.615         |
| Affymetrix         | 1        | rs2749097          | 64127468          | G             | 0.08333                              | 0.2276                              | C                | 11.7          | 0.0006262        | 0.3085        |
| Affymetrix         | 1        | rs855346           | 64127834          | A             | 0.1417                               | 0.08966                             | G                | 2.446         | 0.1178           | 1.676         |
| Affymetrix         | 1        | rs705510           | 64127936          | G             | 0.2                                  | 0.2793                              | C                | 2.802         | 0.09412          | 0.6451        |
| Affymetrix         | 1        | rs2013012          | 64128209          | A             | 0.15                                 | 0.2552                              | G                | 5.395         | 0.0202           | 0.5151        |

**Table S15.** Hardy-Weinberg statistical analysis of rs11208257 among different centres used for replication analysis.

| <b>Centers</b>   | <b>TT</b>  | <b>TC</b> | <b>CC</b> | <b>HWE p-value</b> |
|------------------|------------|-----------|-----------|--------------------|
| Bangalore (B)    | 183        | 93        | 9         | 0.57               |
| Pune (P)         | 136        | 70        | 5         | 0.368              |
| <b>Udupi (U)</b> | <b>107</b> | <b>60</b> | <b>2</b>  | <b>0.04</b>        |

**Table S16.** Association analysis of rs11208257 among 496 *Prakriti* subjects.

| Genotypes       | Vata        | Pitta             | Kapha       | Total | Vata+Kapha  | P-value  |           |          |         |
|-----------------|-------------|-------------------|-------------|-------|-------------|----------|-----------|----------|---------|
|                 |             |                   |             |       |             | Pvs.V+K  | Pvs.Vvs.K | Pvs.V    | Pvs.K   |
| TT              | 0.598 (147) | 0.759 (88)        | 0.627 (84)  | 319   | 0.608 (231) | 0.00616* | 0.024*    | 0.00761* | 0.0235* |
| TC              | 0.37 (91)   | 0.207 (24)        | 0.358 (48)  | 163   | 0.366 (139) |          |           |          |         |
| CC              | 0.033 (8)   | 0.034 (4)         | 0.015 (2)   | 14    | 0.026 (10)  |          |           |          |         |
| Total genotypes | 246         | 116               | 134         | 496   | 380         |          |           |          |         |
| T               | 0.783 (385) | 0.862 (200)       | 0.806 (216) | 801   | 0.791 (601) | 0.02061* | 0.04031*  | 0.0149*  | 0.1203  |
| C               | 0.217 (107) | <b>0.138 (32)</b> | 0.194 (52)  | 191   | 0.209 (159) |          |           |          |         |
| Total alleles   | 492         | 232               | 268         | 992   | 760         |          |           |          |         |

**Table S17.** Distribution of rs11208257 in Indian and HapMap populations.

| Population | TT          | TC          | CC         | Total genotypes | T            | C           | Total alleles |
|------------|-------------|-------------|------------|-----------------|--------------|-------------|---------------|
| INDIA      | 0.674 (747) | 0.293 (325) | 0.032 (36) | 1108            | 0.821 (1819) | 0.179 (397) | 2216          |
| ASW        | 0.623 (33)  | 0.377 (20)  | 0 (0)      | 53              | 0.811 (86)   | 0.189 (20)  | 106           |
| CEU        | 0.69 (78)   | 0.31 (35)   | 0 (0)      | 113             | 0.845 (191)  | 0.155 (35)  | 226           |
| CHB        | 0.69 (58)   | 0.286 (24)  | 0.024 (2)  | 84              | 0.833 (140)  | 0.167 (28)  | 168           |
| CHD        | 0.647 (55)  | 0.329 (28)  | 0.024 (2)  | 85              | 0.812 (138)  | 0.188 (32)  | 170           |
| GIH        | 0.705 (62)  | 0.284 (25)  | 0.011 (1)  | 88              | 0.847 (149)  | 0.153 (27)  | 176           |
| JPT        | 0.721 (62)  | 0.267 (23)  | 0.012 (1)  | 86              | 0.855 (147)  | 0.145 (25)  | 172           |
| LWK        | 0.522 (47)  | 0.389 (35)  | 0.089 (8)  | 90              | 0.717 (129)  | 0.283 (51)  | 180           |
| MEX        | 0.32 (16)   | 0.52 (26)   | 0.16 (8)   | 50              | 0.58 (58)    | 0.42 (42)   | 100           |
| MKK        | 0.62 (88)   | 0.352 (50)  | 0.028 (4)  | 142             | 0.796 (226)  | 0.204 (58)  | 284           |
| TSI        | 0.67 (59)   | 0.307 (27)  | 0.023 (2)  | 88              | 0.824 (145)  | 0.176 (31)  | 176           |
| YRI        | 0.77 (87)   | 0.204 (23)  | 0.027 (3)  | 113             | 0.872 (197)  | 0.128 (29)  | 226           |

## References

1. Reich, D., Thangaraj, K., Patterson, N., Price, A. L., Singh, L. Reconstructing Indian population history. *Nature* **461**, 489-494 (2009).
2. Moorjani, P., *et al.* Genetic evidence for recent population mixture in India. *Am. J. Hum. Genet.* **93**, 422-438 (2013).
